1       **Sensitization of knee-innervating sensory neurons by tumor necrosis factor- $\alpha$  activated**  
2       **fibroblast-like synoviocytes: an in vitro, co-culture model of inflammatory pain.**

3

4       Sampurna Chakrabarti<sup>1</sup>, Zoe Hore<sup>2</sup>, Luke A. Pattison<sup>1</sup>, Sylvine Lalnunhlimi<sup>3</sup>, Charity N.  
5       Bhebhe<sup>1</sup>, Gerard Callejo<sup>1</sup>, David C. Bulmer<sup>1</sup>, Leonie S. Taams<sup>3</sup>, Franziska Denk<sup>2\*</sup>, Ewan St.  
6       John Smith<sup>1\*</sup>.

7                                   <sup>1</sup>Department of Pharmacology, University of Cambridge.

8       <sup>2</sup> Wolfson Centre for Age-Related Diseases, Institute of Psychiatry, Psychology & Neuroscience,  
9       and <sup>3</sup>Centre for Inflammation Biology and Cancer Immunology, Department of Inflammation  
10       Biology, School of Immunology & Microbial Sciences, King's College London

11

12   Total number of pages: 49

13   Figures: 5, Supplementary: 1

14   Tables: 1, Supplementary: 3

15

16   \*Corresponding authors: Ewan St. John Smith, Department of Pharmacology, University of  
17   Cambridge, Tennis Court Road, Cambridge CB2 1PD, United Kingdom, Tel. +44 1223 334  
18   048, Email: [es336@cam.ac.uk](mailto:es336@cam.ac.uk)

19   Franziska Denk, King's College London, Wolfson Centre for Age-Related Diseases, London,  
20   SE1 1UL, United Kingdom, Tel. +44 207 848 8054, Email: [franziska.denk@kcl.ac.uk](mailto:franziska.denk@kcl.ac.uk).

21 **Abstract**

22 Pain is a principal contributor to the global burden of arthritis with peripheral sensitization being  
23 a major cause of arthritis-related pain. Within the knee joint, distal endings of dorsal root ganglion  
24 neurons (knee neurons) interact with fibroblast-like synoviocytes (FLS) and the inflammatory  
25 mediators they secrete, which are thought to promote peripheral sensitization. Correspondingly,  
26 RNA-sequencing has demonstrated detectable levels of pro-inflammatory genes in FLS derived  
27 from arthritic patients. This study confirms that stimulation with tumor necrosis factor (TNF- $\alpha$ ),  
28 results in expression of pro-inflammatory genes in mouse and human FLS (derived from OA and  
29 RA patients), as well as increased secretion of cytokines from mouse FLS. This pro-inflammatory  
30 phenotype was also supported by an increase in the proportion of TNF- $\alpha$  stimulated FLS (TNF-  
31 FLS) responding to acidic stimuli in the pH range 5.0-6.0 as assessed by Ca<sup>2+</sup> imaging.  
32 Electrophysiological recordings from retrograde labelled knee neurons co-cultured with TNF-FLS,  
33 or supernatant derived from TNF-FLS, revealed a depolarized resting membrane potential,  
34 increased spontaneous action potential firing and enhanced TRPV1 function, all consistent with a  
35 role for FLS in mediating the sensitization of pain-sensing nerves in arthritis. Therefore, data from  
36 this study demonstrate the ability of FLS activated by TNF- $\alpha$  to promote neuronal sensitization,  
37 results that highlight the importance of both non-neuronal and neuronal cells to the development  
38 of pain in arthritis.

39

40 Keywords: synoviocytes, sensory neurons, pain, inflammation, tumor necrosis factor, complete  
41 Freund's adjuvant, knee

42

## 43 **Introduction**

44 Joint inflammation and pain are the major clinical symptoms of arthritis. Inflammation is part of  
45 the body's immune response to tissue damage and involves multiple cell types, including  
46 lymphocytes and, in synovial joints, synoviocytes. These non-neuronal cells are either in direct  
47 contact with, or in close proximity to, the distal endings of dorsal root ganglion (DRG) sensory  
48 neurons that innervate the joints, and this interaction is thought to cause peripheral sensitization of  
49 knee-innervating nerves - a key pathology in the development of inflammatory pain.

50 During inflammatory diseases such as rheumatoid arthritis (RA), the joint undergoes hyperplasia  
51 due to T-lymphocyte infiltration and fibroblast-like synoviocyte (FLS) proliferation. FLS are key  
52 effectors in RA as they become active upon stimulation by inflammatory cytokines (released by  
53 macrophage-like synoviocytes, and T-lymphocytes) and secrete matrix metalloproteases (MMP)  
54 that cause joint destruction [9]. Correspondingly, single-cell transcriptional analysis of human RA-  
55 FLS, has identified distinct "destructive" and "inflammatory" FLS subgroups [17]. In addition,  
56 FLS can also support and maintain the ongoing inflammation in arthritic joints by themselves  
57 secreting pro-inflammatory mediators [9]. To better understand the inflammatory phenotype of  
58 FLS, several studies have used cytokine stimulation (e.g. interleukin 1 $\beta$ , IL-1 $\beta$ , or tumor necrosis  
59 factor- $\alpha$ , TNF- $\alpha$ ) to robustly induce inflammation [14,27,30,38]. "Inflamed" FLS have been  
60 utilized in co-culture systems to dissect the complex interaction between FLS and other cell types  
61 in the joint environment. Co-culture of human RA-FLS with T-lymphocytes [7,11,36,62] or  
62 macrophages/monocytes [6,8,15] has been found to increase the concentration of prostaglandin  
63 (PG) E<sub>2</sub>, IL-6, IL-8, MMP-1 and MMP-3 in the culture medium. Furthermore, upregulation of  
64 these pro-inflammatory mediators in culture supernatants was inhibited by anti-TNF- $\alpha$  [11,53] and  
65 anti-IL-6 antibodies [53].

66 However, most co-culture studies have focused on immune interactions during joint inflammation  
67 and therefore, the communication between neurons and synoviocytes is much less understood.  
68 Culturing DRG neurons with FLS derived from chronic antigen-induced arthritic (AIA) rats was  
69 observed to increase the expression of receptors associated with nociception, namely neurokinin  
70 1, bradykinin 2 and transient receptor potential vanilloid 1 (TRPV1) in DRG neurons [4].  
71 However, this study did not functionally assess modulation of DRG neuron excitability, which is  
72 a key mechanism of peripheral sensitization and hence pain. We recently showed that human  
73 osteoarthritic (OA) synovial fluid (a lubricating fluid largely secreted by FLS [5]) can cause  
74 hyperexcitability of murine sensory neurons and increase TRPV1 function [12].

75 Therefore, to establish a suitable pro-inflammatory phenotype for our cultures, we utilized primary  
76 FLS derived from mice undergoing acute, unilateral complete Freund's adjuvant (CFA)-induced  
77 knee inflammation, which can produce neuronal hyperexcitability and a concomitant decrease in  
78 digging behavior [13]. We also tested primary FLS treated with TNF- $\alpha$ , one of the main cytokines  
79 upregulated in CFA-injected mouse tissues [60] and in inflammatory arthritis [51], and validated  
80 our results in human FLS derived from mouse knee and human OA and RA patients. The pro-  
81 inflammatory phenotype of FLS was established to test the hypothesis that after induction of  
82 inflammation, mouse knee-derived FLS will increase excitability and TRP function of knee-  
83 innervating DRG neurons (knee neurons) in an FLS-DRG neuron co-culture system.

84

85

86

87

## 88 **Methods**

### 89 **Animals**

90

91 All mice used in this study were 6-12 week old C57BL/6J mice (Envigo) randomly allocated to  
92 each experiment. Unless otherwise stated, female mice were used since in humans, females are at  
93 a higher risk for inflammatory pain [28]. Mice were housed in groups of up to 5 in a temperature  
94 controlled (21 °C) room with appropriate bedding materials, a red shelter and enrichment. They  
95 were on a 12-hour/light dark cycle with food and water available *ad libitum*. Experiments in this  
96 study were regulated under the Animals (Scientific Procedure) Act 1986, Amendment Regulations  
97 2012. All protocols were approved by a UK Home Office project license granted to Dr Ewan St.  
98 John Smith (P7EBFC1B1) and reviewed by the University of Cambridge Animal Welfare and  
99 Ethical Review Body.

100

### 101 **Knee injections**

102

103 Under anesthesia (100 mg/kg ketamine and 10 mg/kg xylazine, intra-peritoneally) mice were  
104 injected intra-articularly through the patellar tendon into each knee with the retrograde tracer, fast  
105 blue (FB, 1.5 µl 2% in 0.9% saline, Polysciences) or into the left knee with 7.5 µl CFA (10 mg/ml,  
106 Chondrex). Vernier's calipers were used to measure knee width (as before [13]) pre- and 24-hour  
107 post-CFA injection.

108

109 Isolation and culture of FLS

110

111 24-hours after CFA injection into the knee, mice were killed by cervical dislocation and  
112 decapitation. Knee joints were exposed by removing the skin, then the quadriceps muscles were  
113 resected in the middle and pulled distally to expose the patellae. Patellae were then collected by  
114 cutting through the surrounding ligaments, as described before [25], in phosphate-buffered saline  
115 (PBS) and then transferred into one well of a 24-well plate with FLS culture media containing:  
116 Dulbecco's Modified Eagle Medium F-12 Nutrient Mixture (Ham) (Life Technologies), 25% fetal  
117 bovine serum (Sigma), 2 mM glutamine (Sigma) and 100 mg/ml penicillin/streptomycin (Life  
118 Technologies). Cells took approximately 10 days to grow to 70% confluency; medium was  
119 changed every other day. For P1, FLS were trypsinized with 1% trypsin (Sigma), re-suspended in  
120 FLS culture media and transferred into two wells of a 6-well plate. FLS from two animals were  
121 combined at P2. For subsequent passages, FLS were transferred into 60 mm dishes. Contralateral  
122 (Contra) and CFA-injected knees/cells (Ipsi) were kept separate at all stages. The cells were  
123 maintained in a humidified, 37 °C, 5% CO<sub>2</sub> incubator. FLS were also cultured until P5 from mice  
124 that had not undergone any knee CFA injection (control). A random selection of these dishes, from  
125 three separate biological replicates, was incubated for 24 to 48-hours (as per experimental design)  
126 in culture medium with recombinant mouse TNF- $\alpha$  (10 ng/ml from a stock solution of 100  $\mu$ g/ml  
127 made up in 0.2 % bovine serum albumin and sterile PBS, R&D systems, aa-80325) to stimulate  
128 release of inflammatory mediators (TNF-FLS) [29].

129

130 Culture of Raw 264.7 cells

131

132 Raw 264.7 cells (EACC) were cultured in medium containing Dulbecco's Modified Eagle Medium  
133 F-12 Nutrient Mixture (Ham) (Life Technologies), 10% fetal bovine serum (Sigma), 2 mM  
134 glutamine (Sigma) and 100 mg/ml penicillin/streptomycin (Life Technologies). Cells were  
135 maintained in a humidified 37 °C, 5% CO<sub>2</sub> incubator.

136

137 RNA extraction and reverse transcriptase – quantitative/ polymerase chain reaction (RT-q/PCR)  
138 of mouse FLS

139

140 For all conditions, RNA was extracted from two 60 mm dishes (Thermo Fisher) of FLS (various  
141 passages) and from one T-25 flask (Greiner Bio-one) of Raw 264.7 cells at P3 using the RNeasy  
142 Mini Kit (Qiagen). 500 ng of the extracted RNA was used to synthesize cDNA using a High  
143 Capacity cDNA RT kit (Applied Biosystems) following the manufacturer's guidelines, using a  
144 T100 Thermal Cycler (Bio-Rad). The resultant cDNA was diluted to a 1:5 ratio with nuclease free  
145 water and quantitative PCR (qPCR) was performed using a StepOnePlus Real Time PCR system,  
146 following the manufacturer's guidelines on settings (Applied Biosystems) using TaqMan probes  
147 (Thermo Fisher) (Supplementary Table 1 listing genes of interest analyzed in this study). The  
148 fluorescence intensity of samples was captured during the last minute of each cycle. All reactions  
149 were run in triplicate with appropriate negative controls with water containing no cDNA.

150 For RT-qPCR reactions, data were obtained as Ct values (the cycle number at which fluorescent  
151 signals emitted by the TaqMan probe crossed a threshold value). Only Ct values below 35 were  
152 analyzed to determine  $\Delta$ Ct values by subtracting the Ct of 18S ribosomal RNA from the Ct of

153 target gene [39].  $\Delta\text{Ct}$  values of target genes were subtracted from average  $\Delta\text{Ct}$  values of their  
154 controls to calculate  $\Delta\Delta\text{Ct}$ , followed by  $2^{(-\Delta\Delta\text{Ct})}$  to calculate fold change [37].

155 FLS gene expression was also assessed by RT-PCR. DreamTaq Polymerase (Thermo Fisher) was  
156 used to amplify a section within the open reading frames of various genes from 5 ng template  
157 cDNA. The sequences of designed oligonucleotides (Sigma) are listed in Supplementary Table 1.  
158 Negative controls (using water/RNA as the template) were performed for each biological sample  
159 with a randomly selected primer pairing. PCR products were resolved on 2% agarose containing  
160 1X GelRed Nucleic Acid Stain (Biotum) and imaged with a GeneFlash Gel Documentation System  
161 (Syngene). A randomly selected subset of reactions was repeated with 2.5 ng template cDNA to  
162 ensure reproducibility. Densitometry analyses were performed using ImageJ Software (NIH)  
163 where relative expression was determined by dividing the band intensity of each gene by that of  
164 the housekeeping gene, *18S* ribosomal RNA, for each biological replicate.

165

166 Cytokine antibody array

167

168 Before RNA extraction, 2 ml of culture media from P5 Contra, Ipsi, control and TNF-FLS (48-  
169 hour) were collected and stored at  $-80\text{ }^{\circ}\text{C}$  until use. Culture medium was pooled from three cultures  
170 for each of the four conditions and assayed (undiluted) for the presence of 40 inflammatory  
171 mediators using Mouse Inflammatory Antibody Array Membranes (ab133999, Abcam) according  
172 to the manufacturer's instructions. Chemiluminescence was imaged using a BioSpectrum 810  
173 imaging system (UVP) with 3 min exposure. Location of the 40 cytokines detected by the array  
174 membranes are shown in Supplementary Table 2.



175 Densitometry of the spots in the array membranes was performed using ImageJ software (NIH).  
176 Briefly, the mean gray value of each spot was measured from all membranes using the same  
177 circular region of interest. The spots of interests were then subtracted from background (average  
178 of all negative control spots) and normalized to the positive control spots of the reference  
179 membrane (control FLS media). A fold change value was obtained by dividing normalized  
180 intensities of the membrane of interest and the control membrane, analyte-by-analyte.

181

182 Culture of human FLS

183

184 FLS was obtained from 1 OA and 3 RA female patients (age range 61 – 81 years, see  
185 Supplementary Table 3 for detailed patient information) with approval from local ethics committee  
186 (07/H0809/35). These were then seeded separately at 10,000/well in 200  $\mu$ l of DMEM media  
187 (Sigma) supplemented with 10% FCS (Fisher Scientific), 100 units/ml of Penicillin/Streptomycin  
188 (Fisher Scientific), 2% glutamine (Thermo Fisher) and fungizone (Thermo Fisher) into a 96-well  
189 flat bottom plate (Starlab). The plate was incubated overnight at 37 °C to allow for SF attachment  
190 and the following morning media was replaced with either 200 $\mu$ l of fresh DMEM containing 10  
191 ng/ml of TNF- $\alpha$  (PeproTech), or fresh DMEM alone. Supernatants were collected following 24-  
192 hours of incubation at 37 °C.

193

194 RNA extraction and RT-qPCR of human FLS

195

196 RNA was extracted using a RNeasy Micro Kit (Qiagen) according to the manufacturer's protocol,  
197 then reverse transcribed and amplified using a slightly modified version of the Smart-seq2 method  
198 [47]. Briefly, in a RNase/DNA-free fume hood 2  $\mu$ l of RNA was mixed with 1  $\mu$ l of dNTP mix  
199 (Thermo Scientific), 1  $\mu$ l of Oligo-dT primer (Merck) and 5.7  $\mu$ l of RT mix, then reverse  
200 transcribed on a PTC-225 Gradient Thermal Cycler (MJ Research). 15  $\mu$ l of PCR mix was added  
201 to the resulting cDNA and amplified according to previously established protocol. Concentrations  
202 were checked on a Qubit 3.0 (Invitrogen), with values ranging from 20.4 – 45.0 ng/ $\mu$ l. Samples  
203 were diluted to 1 ng/ $\mu$ l with double distilled H<sub>2</sub>O (ddH<sub>2</sub>O) and 1 ng was used for standard SYBR  
204 Green (Roche) RT-qPCR reactions on a LightCycler480 (Roche) to probe for the genes of interest  
205 (see Supplementary Table 1 for primer sequences). All primers were tested for their efficiency and  
206 specificity. The mean of housekeeping genes *B2M* and *Ywhaz* was used to calculate  $\Delta$ Ct values.  
207 All reactions were run in duplicate with water used as a negative control.

208

209 DRG neuron isolation and culture

210

211 Lumbar DRG (L2-L5, those that primarily innervate the knee) were collected from FB labelled  
212 mice 7-10 days after knee injections in ice cold dissociation media containing L-15 Medium (1X)  
213 + GlutaMAX-1 (Life Technologies), supplemented with 24 mM NaHCO<sub>3</sub>. DRG were then  
214 enzymatically digested in type 1A collagenase (Sigma) and trypsin solution (Sigma) at 37 °C,  
215 followed by mechanical trituration as described before [13]. Dissociated DRG neurons were plated  
216 onto poly-D-lysine and laminin coated glass bottomed dishes (MatTek, P35GC-1.5-14-C) and  
217 cultured either on their own (mono-culture), on a layer of FLS (co-culture, see below) or in 48-

218 hour conditioned media from TNF-FLS for 24-hours. The DRG culture medium contained L-15  
219 Medium (1X) + GlutaMAX-1, 10% (v/v) fetal bovine serum, 24 mM NaHCO<sub>3</sub>, 38 mM glucose,  
220 2% (v/v) penicillin/streptomycin.

221

222 DRG neuron/FLS co-culture

223

224 For co-culture studies, FLS were plated onto MatTek dishes and cultured for 24-hours with FLS  
225 culture media (with or without TNF- $\alpha$  stimulation). The next day medium was removed from FLS  
226 plates, then DRG neurons were isolated as described above and plated on top of the FLS. Co-  
227 culture plates were then kept in DRG culture medium for up to 24-hours for electrophysiological  
228 recording.

229

230 Cell staining

231 **FLS immunocytochemistry:** FLS were plated overnight in wells of a 24-well plate, fixed with  
232 Zamboni's fixative [55] for 10 min, permeabilized with 0.05 % TritonX-100 and blocked with  
233 antibody diluent (0.2% (v/v) Triton X-100, 5% (v/v) donkey serum and 1% (v/v) bovine serum  
234 albumin in PBS) for 30 min. The cells were then incubated overnight at 4 °C in 1:100 (in antibody  
235 diluent) anti-cadherin-11 antibody (CDH-11, rabbit polyclonal, Thermo Fisher, 71-7600). Cells  
236 were washed three times with PBS-tween and incubated in the conjugated secondary antibody,  
237 anti-rabbit Alexa-568 (1:1000 in PBS, Thermo Fisher, A10042) for 1-hour at room temperature  
238 (21 °C). The secondary antibody was washed off three times with PBS-tween and the cells were  
239 incubated in the nuclear dye DAPI (1:1000 in PBS, Sigma, D9452) for 10 min. Cells were further

240 washed with PBS-tween once and imaged in PBS using an EVOS FLoid Cell Imaging Station  
241 (Thermo Fisher) at 598 nm (for CDH-11) and 350 nm (for DAPI) wavelength of light. Cells  
242 without primary antibody did not show fluorescence.

243 **DRG neuron/FLS co-culture live cell stain:** To visualize DRG neuron/FLS co-culture, live cell  
244 imaging was performed. FLS were plated on MatTek dishes with 1:1000 (diluted in FLS culture  
245 medium) CellTracker Deep Red Dye (Thermo Fisher, C34565) and incubated for 24-hours in a  
246 humidified 37 °C, 5% CO<sub>2</sub> incubator. Dissociated DRG neurons (see above) were incubated in  
247 CellTracker Green Dye (1: 1000 diluted in DRG culture media, Thermo Fisher, C7025) for 15 min  
248 at room temperature (21 °C), centrifuged (16000 g, 3 min, 5415R, Eppendorf) and re-suspended  
249 in fresh medium. The FLS dishes were then washed twice with PBS and the neuronal suspension  
250 was plated on top of the FLS monolayer and incubated overnight in the incubator. The co-culture  
251 dishes were washed with PBS and imaged the following day using an Olympus BX51 microscope  
252 and QImaging camera at 650 nm (for deep red dye) and 488 nm (for green dye) wavelength of  
253 light.

254

255 Whole-cell patch-clamp electrophysiology

256 DRG neurons were bathed in extracellular solution containing (ECS, in mM): NaCl (140), KCl  
257 (4), MgCl<sub>2</sub> (1), CaCl<sub>2</sub> (2), glucose (4) and HEPES (10) adjusted to pH 7.4 with NaOH. Only FB  
258 labelled neurons identified by their fluorescence upon excitation with a 365 nm LED (Cairn  
259 Research) were recorded. Patch pipettes of 5–10 MΩ were pulled with a P-97 Flaming/Brown  
260 puller (Sutter Instruments) from borosilicate glass capillaries and the intracellular solution used

261 contained (in mM): KCl (110), NaCl (10), MgCl<sub>2</sub> (1), EGTA (1), HEPES (10), Na<sub>2</sub>ATP (2),  
262 Na<sub>2</sub>GTP (0.5) adjusted to pH 7.3 with KOH.

263 Action potentials (AP) were recorded in current clamp mode without current injection (to  
264 investigate spontaneous AP firing) or after step-wise injection of 80 ms current pulses from 0 –  
265 1050 pA in 50 pA steps using a HEKA EPC-10 amplifier (Lambrecht) and the corresponding  
266 Patchmaster software. AP properties were analyzed using Fitmaster software (HEKA) or IgorPro  
267 software (Wavemetrics) as described before [13] and shown in Figure 4D (inset). Neurons were  
268 excluded from analysis if they did not fire an AP in response to current injection. For recording  
269 whole-cell voltage-clamp currents in response to TRP agonists capsaicin (1 μM from a 1 mM stock  
270 in ethanol, Sigma-Aldrich), cinnamaldehyde (100 μM from a 1 M stock in ethanol, Alfa Aesar)  
271 and menthol (100 μM from a 1 M stock in ethanol, Alfa Aesar), a 5 s baseline was established  
272 with ECS, followed by a 5 s randomized drug application. Peak drug response was measured in  
273 Fitmaster by subtracting the average of 2 s baseline immediately preceding the drug application  
274 and the maximum peak response reached during the 5 s of drug application. Peak current density  
275 is represented in graphs by dividing this peak response by the capacitance of the neuron. Data from  
276 at least four mice were used in all conditions (with each mouse being used for at least two  
277 conditions) and at least three neurons were recorded from each mouse in each category.

278

279 Ca<sup>2+</sup> imaging

280 FLS or DRG neurons were incubated with the Ca<sup>2+</sup> indicator, Fluo-4 AM (10 μM diluted in ECS  
281 from a 10 mM stock solution in DMSO, Invitrogen) for 30 min at room temperature (21 °C).  
282 Culture dishes were then washed and imaged using an inverted Nikon Eclipse Ti microscope. Fluo-

283 4 fluorescence was excited using a 470 nm LED (Cairn Research) and captured with a camera  
284 (Zyla cSMOS, Andor) at 1 Hz with 50 ms (for neurons) 250 ms (for FLS) exposure time using  
285 Micro-Manager software (v1.4; NIH). Solutions were perfused in this system through a gravity-  
286 driven 12 barrel perfusion system [20]. During imaging of neurons, MIP-1 $\gamma$  (10 and 100 ng/ml  
287 diluted in ECS from a stock concentration of 0.1 mg/ml in 0.1% bovine serum albumin/sterile  
288 PBS, Sigma) was applied for 20 s after establishing a baseline with ECS for 10 s. Neurons were  
289 allowed to recover for 5 minutes between drug applications. 50 mM KCl was used as a positive  
290 control.

291 During imaging of FLS, a 10 s baseline was established with ECS and then pH 4-7, and TRP  
292 agonists, 1  $\mu$ M capsaicin, 100  $\mu$ M cinnamaldehyde and 100  $\mu$ M menthol were applied for 10 s  
293 before a wash out period of 4 min between drug applications. TRP agonist sensitivity and acid  
294 sensitivity was assessed on separate dishes. Three biological repeats were conducted on separate  
295 days for each condition. 10  $\mu$ M ionomycin was used as a positive control after all FLS Ca<sup>2+</sup>  
296 imaging experiments.

297 Analysis was conducted as described before [12]. Briefly, mean grey values were extracted by  
298 manually drawing around FLS or neurons in the ImageJ software. These values were then fed into  
299 a custom-made R-toolbox (<https://github.com/amapruns/Calcium-Imaging-Analysis-with-R.git>)  
300 to compute the proportion of cells responding to each drug and their corresponding magnitude of  
301 response (normalized to their peak ionomycin (FLS) or KCl (neuron) response, ( $\Delta F/F_{max}$ ); cells  
302 not crossing threshold for positive controls were excluded from the analysis).

303

304 Extraction of RNA-Seq data from RA and OA patient synovial tissue samples

305

306 Publicly available single cell RNA-Seq data of synovial tissue from 51 OA and RA patients [63]  
307 was used to investigate the presence of pro-inflammatory genes. For each sample, we extracted  
308 the transcripts per million (TPM) values for the same genes investigated for RT-qPCR of human  
309 FLS and organised data by patient ID, cell type and patient group. The 17 samples that failed or  
310 were pending quality control were excluded. The remaining 151 samples were subsequently  
311 plotted by dividing into two groups – OA and RA.

312

313 Statistics

314

315 Comparisons between two groups with distributed variables were performed using two-sided  
316 Student's t-tests (paired if comparing two conditions of the same sample, unpaired otherwise) with  
317 suitable corrections and amongst three groups using one-way analysis of variance (ANOVA)  
318 followed by Tukey's post-hoc tests. Proportions were compared for categorical data using chi-sq  
319 tests. Data are shown as mean  $\pm$  SEM.

320

321

322

323

324

## 325 **Results**

326

327 1. TNF-FLS, but not FLS derived from CFA-induced inflamed knees of mice, have a pro-  
328 inflammatory phenotype and secrete cytokines that activate DRG neurons.

329 Key genes have been described that act as identifiers of cultured FLS upon isolation by enzymatic  
330 digestion of mouse joints [29], as well as for establishing their inflammatory phenotype. In this  
331 study, we performed RT-qPCR on adherent cells (passages P2-P5) originating from mouse patellae  
332 that proliferated in culture (Figure 1A, B). From P2 to P3, the expression of the macrophage marker  
333 [5,29] cluster of differentiation 68 (*Cd68*, relative to the macrophage cell line RAW 267.4) was  
334 significantly reduced, whereas the expression of FLS markers *Cdh11* and *Cd248* [5,29] remained  
335 consistent from P2 to P5 (Supplementary Figure 1A, B showing expression of FLS marker genes);  
336 the endothelial marker *Cd31* was not detected (data not shown). These results suggest that from  
337 P3, cells cultured from mouse patellae were predominantly FLS and hence subsequent studies were  
338 conducted on FLS from P3-P6.

339 Concurrently, to establish the pro-inflammatory phenotype of FLS, we used RT-qPCR to  
340 determine the expression of the inflammatory genes *Il-6*, *Il-1r1* and *Cox-2*, as well as the  
341 constitutively expressed gene *Cox-1*. When control FLS (P5) were stimulated with 10 ng/ml TNF-  
342  $\alpha$  for 48-hours, there was an upregulation of *Il-6* (fold changes: Control,  $1.5 \pm 0.8$  vs. TNF-FLS,  
343  $135.1 \pm 31.1$ ,  $n = 3$ ,  $p = 0.006$ , unpaired t-test) and *Il-1r1* (fold changes: Control,  $1.1 \pm 0.2$  vs.  
344 TNF-FLS,  $3.4 \pm 1.0$ ,  $n = 3$ ,  $p = 0.04$ , unpaired t-test) expression levels, but not that of *Cox-2* (fold  
345 changes: Control,  $1.0 \pm 0.2$  vs. TNF-FLS,  $0.8 \pm 0.2$ ,  $n = 3$ ,  $p = 0.2$ , unpaired t-test) or *Cox-1* (fold  
346 changes: Control,  $1.0 \pm 0.2$  vs. TNF-FLS,  $0.8 \pm 0.2$ ,  $n = 3$ ,  $p = 0.18$ , unpaired t-test) (Figure 1C).



347 However, when FLS derived from the inflamed knee (Ipsi, knee width, pre-CFA,  $3.1 \pm 0.09$  mm  
348 vs. post-CFA,  $4.1 \pm 0.08$  mm,  $n = 6$ ,  $p = 0.0001$ , paired t-test, Supplementary Figure 1C showing  
349 knee width of mice pre and post-CFA injection) of CFA injected mice were compared to those of  
350 the matched contralateral knee (Contra), we did not find any changes in expression levels of the  
351 genes between Contra and Ipsi FLS across P2-P5 (Figure 1C, Supplementary Figure 1C).

352 We next tested the media ( $n = 3$ , each) isolated from control, Contra, Ipsi and TNF-FLS against a  
353 mouse inflammation antibody array (Figure 1D) to determine the levels of different secreted pro-  
354 inflammatory mediators. This demonstrated that when compared to control FLS media, TNF-FLS  
355 media showed presence of regulated on activation, normal T-cell expressed and secreted  
356 (RANTES) and granulocyte-macrophage colony stimulating factor (GM-CSF). Additionally,  
357 TNF-FLS contained higher levels of IL-6 ( $p < 0.0001$ ), keratinocyte chemoattractant (KC, mouse  
358 homolog of IL-8,  $p < 0.0001$ ), lipopolysaccharide induced chemokine (LIX,  $p < 0.0001$ ), stromal  
359 cell derived factor 1 (SDF-1,  $p < 0.0001$ ), fractalkine ( $p < 0.0001$ ), monocyte chemoattractant  
360 protein 1 (MCP-1,  $p < 0.0001$ ) and macrophage inhibitory protein  $1\gamma$  (MIP- $1\gamma$ ,  $p = 0.002$ ) and  
361 lower levels of macrophage colony stimulating factor (MCSF,  $p = 0.003$ ) compared to control FLS  
362 media (multiple t-tests with Holm-Sidak corrections, Figure 1Dii). TNF- $\alpha$  was not detected in  
363 TNF-FLS media as previously shown in TNF- $\alpha$  stimulated airway epithelial cells [22]. Mirroring  
364 the absence of pro-inflammatory gene upregulation in Ipsi vs. Contra FLS, the spot intensity values  
365 of inflammatory cytokines between Ipsi and Contra FLS were similar (multiple t-tests with Holm-  
366 Sidak corrections, graph not shown), suggesting similar levels of secreted cytokines. Finally, when  
367 spot intensities were normalized to control FLS, TNF-FLS media showed increased levels of  
368 secreted IL-6 ( $p < 0.0001$ , ANOVA followed by Tukey's multiple comparison test) and KC ( $p =$

369 0.001, ANOVA followed by Tukey's multiple comparison test) compared to Ipsi and Contra FLS  
370 (Figure 1Diii).

371 MIP-1 $\gamma$  was elevated in both Ipsi and Contra FLS when compared to control and TNF-FLS (Figure  
372 1Diii), perhaps indicating its role in acute, systemic inflammatory pathways. MIP-1 $\gamma$  has been  
373 described as having a role in hyperalgesia induced by diabetic neuropathy [48] and OA-related  
374 pain [19]. We find that MIP-1 $\gamma$  directly activates mouse DRG neurons by producing a dose-  
375 dependent Ca<sup>2+</sup> influx (Supplementary Figure 1D showing intracellular Ca<sup>2+</sup> mobilization in DRG  
376 neurons upon MIP-1 $\gamma$  application), which thus might be a potential mechanism for the *in vivo*  
377 effects described above. However, because MIP-1 $\gamma$  does not have a human homolog (NCBI gene  
378 database entry #20308), and thus has limited clinical potential, we did not explore this further.

379 Taken together, our data suggest that TNF- $\alpha$  stimulation of FLS upregulates expression of  
380 canonical inflammatory markers, whereas the knee inflammation observed 24-hours after intra-  
381 articular CFA injection does not correlate with a sustained pro-inflammatory phenotype of FLS  
382 isolated from patellae of CFA mice. We also identify other soluble mediators secreted by TNF-  
383 FLS that might be involved in FLS-DRG neuron communication. Therefore, given the pro-  
384 inflammatory phenotype of TNF-FLS (and the lack of such phenotype in the FLS expanded from  
385 CFA-injected knees), we focused solely on the TNF-FLS for the rest of the study.

386

387

388

389           2. TNF- $\alpha$  stimulated human FLS from OA and RA patients show increased expression  
390           of multiple pro-inflammatory genes that were upregulated in mouse TNF-FLS.

391   In order to understand whether the identified pro-inflammatory mediators from mouse FLS are  
392   important in human arthritis, we examined gene expression in human FLS. In arthritis, activated  
393   FLS contribute to pathogenesis by damaging synovial membranes and secreting inflammatory  
394   cytokines which in turn recruit immune cells [31,42,43]. In line with these reports, data re-plotted  
395   from a recently published single-cell RNA-seq dataset of FLS from 51 OA and RA patients [63]  
396   confirms detectable levels of pro-inflammatory genes *IL-6*, *KC*, *MCP-1*, *IL-8*, *IL1-RI*, *SDF-1* and  
397   *Fractalkine* (Figure 2A), which matches our mouse data in Figure 1.

398   Furthermore, to establish whether a similar pro-inflammatory phenotype can be observed in TNF-  
399    $\alpha$  treated human FLS as in mouse FLS, we used RT-qPCR. When human FLS (n = 4) were  
400   stimulated with 10 ng/ml TNF- $\alpha$  for 24-hours, there was increased expression of *IL-6* (p = 0.02),  
401   *KC* (p = 0.001), *LIX* (p = 0.009), *MCP-1* (p = 0.0004) and *IL-8* (p = 0.005) compared to  
402   unstimulated controls (unpaired t-test) (Figure 2B). However, expression *SDF-1* (p = 0.8), *IL-1RI*  
403   (p = 0.3) and *Fractalkine* (p = 0.3) was not significantly different in the TNF group compared to  
404   control (unpaired t-test), although for the latter two genes, FLS from some patients showed  
405   considerable increase after TNF- $\alpha$  stimulation (Figure 2B).

406   The data presented here demonstrate the translational potential of our data derived from mouse  
407   FLS (Figure 1), as well as supporting a previous study that showed increased cytokine production  
408   from TNF- $\alpha$  stimulated human FLS from both normal and RA donors compared to unstimulated  
409   ones [31].

410 3. TNF-FLS have reduced sensitivity to mild acidosis, but enhanced sensitivity to more  
411 acidic pH.

412 During arthritis, FLS are located in an environment with abundant algogens that have been shown  
413 to signal through the modulation of TRP channels [9] and there is also mixed evidence in animals  
414 and humans for development of tissue acidosis [3,24,61]. Therefore, we tested the sensitivity of  
415 mouse knee-derived FLS to a range of acidic pH stimuli, as well as the prototypic TRP channel  
416 agonists, capsaicin (TRPV1), cinnamaldehyde (TRPA1) and menthol (TRPM8) using  $\text{Ca}^{2+}$   
417 imaging. Confirming results from other studies on acid sensing in FLS [26], we found that both  
418 control and TNF-FLS respond to a range of pH solutions (pH 4.0 – 7.0) with an increase in  
419 intracellular  $[\text{Ca}^{2+}]$  (Figure 3A, B). An increased percentage of control FLS (24.1 %) respond to  
420 pH 7.0 compared to TNF-FLS (11.0 %,  $p = 0.0004$ , chi-sq test), but in the more acidic range an  
421 increased percentage of TNF-FLS responded to acid than did control FLS, i.e. pH 6.0 (control, 7.2  
422 % vs. TNF-FLS, 26.3 %,  $p < 0.0001$ , chi-sq test) and pH 5.0 (control, 14.4 % vs. TNF-FLS, 30.5  
423 %,  $p < 0.0001$ , chi-sq test). At the very acidic pH of 4.0, ~ 40% ( $p = 0.4$ , chi-sq test) of FLS  
424 responded in both groups possibly due to ceiling effect. Although the proportion of responding  
425 neurons varied, the magnitude of peak normalized response was similar across the pH range in  
426 control (pH 7.0:  $0.4 \pm 0.04$  F/Fmax (n = 50), pH 6.0:  $0.4 \pm 0.08$  F/Fmax (n = 27), pH 5.0:  $0.3 \pm$   
427  $0.03$  F/Fmax (n = 46), pH 4.0:  $0.3 \pm 0.02$  F/Fmax (n = 129)) and TNF-FLS (pH 7.0:  $0.3 \pm 0.06$   
428 F/Fmax (n = 21), pH 6.0:  $0.4 \pm 0.03$  F/Fmax (n = 50), pH 5.0:  $0.3 \pm 0.02$  F/Fmax (n = 58), pH 4.0:  
429  $0.3 \pm 0.02$  F/Fmax (n = 72), Figure 3Bii).

430 To identify the proton sensors expressed by FLS that likely mediate the responses measured, we  
431 conducted RT-PCR of control and TNF-FLS to determine expression of known proton-sensing G  
432 protein-coupled receptors (GPCRs), ASICs and TRPV1. Our data show that FLS express the

433 proton sensing GPCRs – *Gpr4*, *Gpr65*, *Gpr68* and *Gpr132*, as well as *Asic1*, *Asic3* and *Trpv1*  
434 (Figure 3Ci). When relative expression was assessed compared to the housekeeping gene *18S*,  
435 *Gpr132* was found to be increased ( $p = 0.005$ , Figure 3Cii) in TNF-FLS implicating it as a potential  
436 contributor to the enhanced proportion of acid responders seen in TNF-FLS (Figure 3Bi). The pro-  
437 inflammatory phenotype of TNF-FLS was confirmed by the increased *Il-6* band intensity ( $p <$   
438  $0.0001$ ), as observed previously using qPCR (multiple t-tests with Holm-Sidak corrections, Figure  
439 3Cii).

440 We also tested FLS sensitivity to capsaicin (control, 3/201, TNF-FLS, 13/252), cinnamaldehyde  
441 (control, 1/201, TNF-FLS, 11/252) and menthol (control, 0/201, TNF-FLS, 1/194) to find that only  
442 a few cells responded to each compound (data not shown). This led us to conclude that there are  
443 very few mouse primary FLS with functional TRPV1 (corroborated by the observation of low  
444 *Trpv1* gene expression, Figure 3C), TRPA1 or TRPM8 ion channels and hence we did not explore  
445 this further.

446

#### 447 4. TNF-FLS increase knee-innervating DRG neuron excitability in co-culture.

448 Changes in primary sensory neuron excitability underlie peripheral sensitization which drives  
449 arthritis-related pain [56]. Non-neuronal cells like FLS, which are in close proximity with distal  
450 terminals of knee neurons, can play instrumental roles in modulating sensory neuron excitability  
451 by direct cell contact and/or secretion of pro-inflammatory cytokines. To determine neuron/FLS  
452 communication in health and inflammation we compared the DRG neuronal excitability of four  
453 groups: 1) knee neuron mono-culture, 2) knee neurons co-cultured with control FLS (Figure 4A,  
454 B), 3) knee neurons with FLS that have been exposed to TNF media for 24-hour followed by DRG

455 culture media for 24-hours and 4) knee neurons with conditioned media from FLS that have been  
456 exposed to TNF media for 48-hours to understand the role of soluble mediators in peripheral  
457 sensitization. In current-clamp mode, we observed many neurons spontaneously firing AP in  
458 groups 3 and 4. In order to statistically compare the proportions, we converted our four group data  
459 into binary categories: neuron mono-culture and neuron/control FLS co-culture were assigned to  
460 the class “healthy”, and neuron/TNF-FLS and neuron/TNF-FLS media were assigned to the class  
461 “inflamed”. 19.5% of inflamed neurons (neuron/TNF-FLS, 5/21; neuron/TNF-FLS media, 3/19)  
462 fired spontaneous AP compared to 2.7% (neuron mono-culture, 0/19; neuron/control FLS, 1/18)  
463 of healthy neurons ( $p = 0.02$ , chi-sq test) suggesting that there is a general increase in excitability  
464 of knee neurons when exposed to an FLS-mediated inflammatory environment (Figure 4C, D).

465 Upon measuring the AP properties (Figure 4D inset) we found that the resting membrane potential  
466 (RMP) was more depolarized in the neuron/TNF-FLS media group compared to both neuronal  
467 mono-culture ( $p = 0.0004$ ) and neuron/control FLS co-culture ( $p = 0.012$ ), which highlights that  
468 secreted pro-inflammatory factors from TNF-FLS likely act upon knee neurons to increase their  
469 excitability (ANOVA followed by Tukey’s post hoc comparison, Figure 4Ei). The other measured  
470 properties were unchanged among the four groups (ANOVA followed by Tukey’s post hoc  
471 comparison, Table 1, Figure 4Eii-iv).

472

473 5. TNF-FLS increase TRPV1 function and decrease TRPA1/TRPM8 function of DRG  
474 neurons in co-culture.

475 DRG neurons in co-culture with inflamed FLS derived from AIA rats reportedly have increased  
476 expression of TRPV1 [4]. Here we sought to investigate whether FLS can modulate knee neuron

477 responses to TRP channel agonists using whole-cell patch-clamp recordings. Knee neurons in  
478 mono-culture and when co-cultured with control FLS displayed very similar responses, i.e. a mean  
479 capsaicin peak current density response of  $3.5 \pm 1.0$  pA/pF ( $n = 7$ ) and  $3.2 \pm 0.9$  pA/pF ( $n = 7$ )  
480 respectively. By contrast, knee neurons in neuron/TNF-FLS co-culture showed a trend for larger  
481 magnitude of capsaicin responses ( $27.7 \pm 9.3$  pA/pF,  $n = 8$ ), and those cultured with TNF-FLS  
482 media had a capsaicin response of  $65.8 \pm 25.7$  pA/pF ( $n = 7$ ) which was significantly larger in  
483 magnitude than neuronal mono-culture ( $p = 0.02$ ) and neuron/control FLS co-culture ( $p = 0.02$ )  
484 (ANOVA followed by Tukey's post-hoc comparison, Figure 5Ai,ii). However, no difference was  
485 observed between the percentage of capsaicin responders in healthy (40.5%) vs. inflamed groups  
486 (37.5%,  $p = 0.8$ , chi-sq test, Figure 5Aiii), suggesting that although TRPV1 channel function is  
487 sensitized in TRPV1-expressing neurons, TNF-FLS exposure does not induce TRPV1 expression  
488 in neurons lacking any basal expression.

489 With regards to menthol (mono-culture,  $2.4 \pm 1.2$  pA/pF,  $n = 7$ ; neuron/healthy FLS,  $4.8 \pm 2.1$   
490 pA/pF,  $n = 6$ ; neuron/TNF-FLS,  $1.4 \pm 1.2$  pA/pF,  $n = 2$ ; neuron/TNF-FLS conditioned media,  $4.0$   
491  $\pm 1.9$  pA/pF,  $n = 4$ ; Figure 5Bi) and cinnamaldehyde (mono-culture,  $1.9 \pm 0.7$  pA/pF,  $n = 10$ ;  
492 neuron/healthy FLS,  $2.8 \pm 1.1$  pA/pF,  $n = 4$ ; neuron/TNF-FLS,  $0.6 \pm 0.3$  pA/pF,  $n = 3$ ,  
493 neuron/TNF-FLS conditioned media,  $2.3 \pm 1.5$  pA/pF,  $n = 3$ ; Figure 5Ci) responses, all four groups  
494 showed similar mean peak current density values (Figure 5Bii, Cii). However, in response to both  
495 the TRPA1 and TRPM8 agonists, the percentage of responding neurons was significantly less in  
496 the inflamed group compared to healthy (menthol: healthy vs. inflamed, 37.8% vs. 15%,  $p = 0.02$ ,  
497 chi-sq test; cinnamaldehyde: healthy vs. inflamed, 43.2% vs. 15%,  $p = 0.006$ , chi-sq test, Figure  
498 5Biii, Ciii). Taken together our data suggest that "inflamed" FLS can alter TRP channel agonist  
499 response of knee neurons in co-culture.

## 500 **Discussion**

501 FLS can respond to pro-inflammatory environments and then themselves become effectors for  
502 driving disease pathology, and hence are called “passive responders and imprinted aggressors” [9].  
503 In support of their activated phenotype, here we demonstrate that FLS obtained from human OA  
504 and RA patients and from cell-outgrowth of mouse patella can respond to TNF- $\alpha$  stimulation to  
505 increase secretion and expression of several pro-inflammatory mediators. We used these findings  
506 to establish a co-culture system, which showed that murine FLS and knee neurons can interact,  
507 specifically, factors secreted by TNF-FLS increase knee neuron excitability and the magnitude of  
508 the response to capsaicin, whereas the proportions of cinnamaldehyde and menthol responding  
509 neurons are diminished. To the best of our knowledge, this is the first report to demonstrate FLS-  
510 mediated changes in neuronal excitability in co-culture and hence directly demonstrate how FLS  
511 can regulate articular neurons and in turn arthritis-related pain.

512 FLS from mouse are generally cultured by enzymatically digesting and combining excised joints  
513 of fore- and hind-limbs [26,29,49,54], which assumes similarity of FLS derived from all joints.  
514 However, a genome-wide study on DNA-methylation has shown that important differences exist  
515 between knee and hip FLS, including of genes involved in IL-6 signaling [1]. By using a cell-  
516 outgrowth method to culture mouse FLS, as previously described in humans [33] and rats [4], we  
517 have avoided the biological ambiguity introduced by joint-to-joint variability. Using these FLS,  
518 we investigated the expression of inflammatory genes *Il-6*, *Il-1r1* and *Cox-2*, all of which have  
519 been linked to the inflammatory phenotype of FLS. In brief: stimulating human-derived FLS with  
520 IL-1 $\beta$  increases *Cox-2* and *Il-6* expression [33]; increased *Il-6* expression is seen in FLS derived  
521 from K/BxN mice and following 24-hour stimulation of healthy mouse FLS with TNF- $\alpha$  [29].  
522 Lastly, supernatants from cultured FLS derived from rats 3-days into AIA model show increased



523 IL-6 and PGE<sub>2</sub> [4]. Here we observed that neither the expression level of *Il-6*, *Il-1r1*, *Cox-2*, nor  
524 the level of secreted cytokines was upregulated in FLS derived from CFA-injected knee (our local  
525 ethics review body did not permit investigation of > 24-hours following CFA injection). This is  
526 possibly because the model used here is too brief to influence FLS gene expression. Indeed,  
527 evidence to support this is that FLS derived from rats with longer (3-28 days) AIA-induced knee  
528 inflammation did have higher PGE<sub>2</sub> and IL-6 concentrations in culture supernatants compared to  
529 control FLS [4]. Alternatively, the affected area of the synovium might be too small for sufficient  
530 proliferation of “inflamed” FLS and thus they are lost over time in culture.

531 TNF- $\alpha$  is a cytokine that is locally upregulated within 3-hours of intra-plantar CFA injection in  
532 mice [60]. It is also present in high concentrations in the synovial fluid [35,51] and tissue of OA  
533 and RA patients [45,58]; along with anti-TNF- $\alpha$  agents being a leading treatment of RA [57].  
534 Indeed, we show that TNF- $\alpha$  stimulated FLS display increased expression of *Il-6* and *Il-1r1*  
535 mRNA, with a concomitant increase in secretion of many pro-inflammatory cytokines, including  
536 IL-6 - a finding reported previously in human FLS [31] and replicated in this study. Although this  
537 observation is consistent with FLS being effectors of inflammatory arthritis, the functional  
538 repercussions of this pro-inflammatory phenotype are not well-explored and here we investigate  
539 two such possibilities: change in FLS functionality after induction of inflammation and “inflamed”  
540 FLS-induced functional changes in nerves supplying the knee joint to drive pain.

541 Since arthritic FLS reside in a pro-inflammatory environment which is often [3] (but not always  
542 [61]) acidic, it is perhaps unsurprising that they express proton sensors [16,34]. Comparing the  
543 control and TNF-FLS response to acidic stimuli, we found a decreased percentage of TNF-FLS  
544 responding to pH 7.0, but in the pH 6.0-5.0 range the percentage of TNF-FLS responding to acidic  
545 stimulation increased. Multiple proton-sensors with sensitivity to varied pH range might underlie

546 the apparent incongruity of TNF-FLS acid sensitivity in mild and strongly acidic environment  
547 [46]. For example, increased expression of proton sensors programmed to detect highly acidic  
548 environments can come at the cost of sensors active at mildly acidic range. This concept has been  
549 alluded to previously with mouse primary FLS showing increased *Asic3*, but decreased *Asic1*,  
550 expression after IL-1 $\beta$  stimulation [26]. The present study shows that ASIC1 and 3 may underlie  
551 acid sensitivity in FLS, as has been shown previously [26,54] and here we also show that multiple  
552 proton sensing GPCRs are expressed in FLS. Furthermore, TRPV1 is activated at pH below 6,  
553 which can contribute to the enhanced acid response of TNF-FLS in that range.

554 In order to understand the effector role of FLS in driving nociception through peripheral  
555 sensitization, we set up a co-culture system combining FLS and knee neurons. Studying co-culture  
556 of rat FLS and DRG neurons, von Banchet *et al* showed using immunohistochemistry that  
557 bradykinin 2 receptor labelling (but not that of neurokinin 1 or TRPV1) was increased when DRG  
558 neurons were cultured with healthy rat FLS [4], i.e. co-culture of DRG neurons with FLS can alter  
559 expression of genes associated with nociception. Therefore, we first verified that knee neurons in  
560 co-culture with control FLS do not show dysregulation of excitability or TRP agonist response.  
561 Then we asked whether TNF-FLS modulate knee neuron function and found using whole-cell  
562 patch clamp that 23% and 16% of knee neurons in neuron/TNF-FLS co-culture and neuron/TNF-  
563 FLS media (“inflamed” conditions) respectively evoked spontaneous AP compared to 6% in  
564 neuron/control FLS and 0% in neuron mono-culture (“healthy” conditions). This suggests that  
565 TNF-FLS increase excitability of knee neurons and thus contribute to arthritic pain.

566 von Banchet *et al* [4] also showed that compared to mono-culture, FLS derived from acute and  
567 chronic AIA rats induced an increase in TRPV1 protein expression in DRG neurons, which can  
568 also lead to sensitization and hence arthritic pain. However, we did not observe an increase in the

569 proportion of neurons responding to capsaicin between healthy and inflamed conditions, which  
570 might reflect a species difference and/or difference in knee-specific neuronal population (unlike  
571 in this study, von Banchet *et al* did not discriminate between knee-innervating neurons and non-  
572 knee innervating neurons); however, we did observe that capsaicin responsive neurons produced  
573 larger magnitude responses when incubated with TNF-FLS medium (see below). We also observed  
574 that cinnamaldehyde- and menthol-evoked responses were decreased in the inflamed condition,  
575 suggesting functional downregulation of TRPA1 and TRPM8, which might compensate for  
576 TRPV1 sensitization with regard to overall neuron excitability. Functional downregulation of  
577 TRPA1 might be explained through desensitization via increased TRPV1 function (see below) [2]  
578 or via an increase in intracellular  $[Ca^{2+}]$  (due to increased excitability in the inflamed condition)  
579 [59]. The latter reason can also be applied to explain decrease of menthol-evoked responses [50].

580 We also observed a tendency of a more depolarized RMP and an enhanced magnitude of capsaicin-  
581 evoked peak current density of knee neurons in “inflamed” conditions, albeit both only reached  
582 statistical significance in the TNF-FLS media incubated group when compared to mono-culture  
583 and neuron/control FLS. These results suggest that soluble mediators released by FLS are key  
584 players in modulating knee neuron excitability. We posit that because our experimental design  
585 involved a media change 24-hours after TNF incubation of FLS (so as not to directly stimulate  
586 neurons with residual TNF- $\alpha$  [18]) in the neuron/TNF-FLS co-culture condition, the accumulated  
587 soluble mediator concentrations were lower compared to when knee neurons were incubated in  
588 48-hours TNF-FLS conditioned media (no remaining TNF- $\alpha$  was measured in the media at this  
589 point). Indeed we have recently established the role of soluble mediators present in OA synovial  
590 fluid in increasing neuronal excitability and TRPV1 function [12]. These soluble mediators mainly  
591 consist of cytokines/chemokines which form complex signaling pathways with neurons (reviewed

592 in [41,52]). In this study, we have identified several of them to be upregulated in TNF-FLS media  
593 which have been reported to be able to directly signal to neurons: IL-6 [23], KC [10], RANTES  
594 [44], GM-CSF [21], LIX [40], SDF-1 [44], MCP-1 [32], and MIP-1 $\gamma$  (present study). In the case  
595 of IL-6, MCP-1 and GM-CSF there have also been reports of an increase in TRPV1 function  
596 [21,23,32].

597 In summary, we have established a co-culture system to provide evidence for a direct  
598 inflammation-pain axis through FLS and DRG neurons. In the future, it can be adapted to  
599 investigate peripheral sensitization using FLS activated by other pro-inflammatory cytokines or  
600 arthritic synovial fluid.

601

#### 602 **Acknowledgements:**

603 The authors thank Dr Dora Lopresto (Department of Pharmacology, University of Cambridge) for  
604 technical help with cell staining and Dr Lucy Durham for collection of human FLS samples.

605 Conflict of interests: The authors declare no competing interests.

606 Research Funding: This study was supported by Versus Arthritis Project Grants (RG 20930 and  
607 RG 21973), a Rosetrees grant (M818) to E. St. J. S. and G.C., Crohn's and Colitis UK grant to  
608 D.C.B. (PC2019/1-Bulmer), and a King's Together Award to L.S.T. and F.D. S.C. and C.N.B  
609 were supported by Gates Cambridge Trust scholarships. L.A.P. was supported by the University  
610 of Cambridge BBSRC Doctoral Training Programme (BB/M011194/1). S.L. was supported by  
611 Versus Arthritis (21139).

612

613 Availability of data and materials:

614 The datasets supporting the conclusions of this article will be available in University of Cambridge

615 Apollo Repository (<https://doi.org/10.17863/CAM.44367>).

616

617

618

619

620

621

622

623

624

625

626

627

628

629

630

631

632 References:

- 633 [1] Ai R, Hammaker D, Boyle DL, Morgan R, Walsh AM, Fan S, Firestein GS, Wang W. Joint-  
634 specific DNA methylation and transcriptome signatures in rheumatoid arthritis identify distinct  
635 pathogenic processes. *Nat Commun* 2016;7:11849–11849.
- 636 [2] Akopian AN, Ruparel NB, Jeske NA, Hargreaves KM. Transient receptor potential TRPA1  
637 channel desensitization in sensory neurons is agonist dependent and regulated by TRPV1-directed  
638 internalization. *J Physiol* 2007;583:175–193.
- 639 [3] Andersson SE, Lexmuller K, Johansson A, Ekstrom GM. Tissue and intracellular pH in normal  
640 periarticular soft tissue and during different phases of antigen induced arthritis in the rat. *J*  
641 *Rheumatol* 1999;26:2018–2024.
- 642 [4] von Banchet GS, Richter J, Hüchel M, Rose C, Bräuer R, Schaible H-G. Fibroblast-like synovial  
643 cells from normal and inflamed knee joints differently affect the expression of pain-related  
644 receptors in sensory neurones: a co-culture study. *Arthritis Research & Therapy* 2007;9:R6–R6.
- 645 [5] Bartok B, Firestein GS. Fibroblast-like synoviocytes: key effector cells in rheumatoid arthritis.  
646 *Immunological reviews* 2010;233:233–255.
- 647 [6] Blue ML, Conrad P, Webb DL, Sarr T, Macaro M. Interacting monocytes and synoviocytes induce  
648 adhesion molecules by a cytokine-regulated process. *Lymphokine Cytokine Res* 1993;12:213–218.
- 649 [7] Bombara MR, Webb DL, Conrad P, Marior CW, Sarr T, Ranges GE, Aune TM, Grave JM, Blue  
650 M-L. Cell contact between T cells and synovial fibroblasts causes induction of adhesion molecules  
651 and cytokines. *Journal of Leukocyte Biology* 1993;54:399–406.
- 652 [8] Bondeson J, Wainwright SD, Lauder S, Amos N, Hughes CE. The role of synovial macrophages  
653 and macrophage-produced cytokines in driving aggrecanases, matrix metalloproteinases, and other  
654 destructive and inflammatory responses in osteoarthritis. *Arthritis Research & Therapy*  
655 2006;8:R187.
- 656 [9] Bottini N, Firestein GS. Duality of fibroblast-like synoviocytes in RA: passive responders and  
657 imprinted aggressors. *Nat Rev Rheumatol* 2013;9. doi:10.1038/nrrheum.2012.190.
- 658 [10] Brandolini L, Benedetti E, Ruffini PA, Russo R, Cristiano L, Antonosante A, d'Angelo M, Castelli  
659 V, Giordano A, Allegretti M, Cimini A. CXCR1/2 pathways in paclitaxel-induced neuropathic  
660 pain. *Oncotarget* 2017;8:23188–23201.
- 661 [11] Burger D, Rezzonico R, Li J-M, Modoux C, Pierce RA, Welgus HG, Dayer J-M. Imbalance  
662 between interstitial collagenase and tissue inhibitor of metalloproteinases 1 in synoviocytes and  
663 fibroblasts upon direct contact with stimulated T lymphocytes: Involvement of membrane-  
664 associated cytokines. *Arthritis & Rheumatism* 1998;41:1748–1759.
- 665 [12] Chakrabarti S, Jadon DR, Bulmer DC, Smith EstJ. Human osteoarthritic synovial fluid increases  
666 excitability of mouse dorsal root ganglion sensory neurons: an in-vitro translational model to study  
667 arthritic pain. *Rheumatology* 2019. doi:10.1093/rheumatology/kez331.

- 668 [13] Chakrabarti S, Pattison LA, Singhal K, Hockley JRF, Callejo G, Smith EStJ. Acute inflammation  
669 sensitizes knee-innervating sensory neurons and decreases mouse digging behavior in a TRPV1-  
670 dependent manner. *Neuropharmacology* 2018;143:49–62.
- 671 [14] Chen C-X, Chen J-Y, Kou J-Q, Xu Y-L, Wang S-Z, Zhu Q, Yang L, Qin Z-H. Suppression of  
672 Inflammation and Arthritis by Orally Administrated Cardiotoxin from *Naja naja atra*. *Evid Based*  
673 *Complement Alternat Med* 2015;2015:387094.
- 674 [15] Chomarat P, Risoan MC, Pin JJ, Banchereau J, Miossec P. Contribution of IL-1, CD14, and  
675 CD13 in the increased IL-6 production induced by in vitro monocyte-synoviocyte interactions. *J*  
676 *Immunol* 1995;155:3645.
- 677 [16] Christensen BN, Kochukov M, McNearney TA, Tagliabatella G, Westlund KN. Proton-sensing G  
678 protein-coupled receptor mobilizes calcium in human synovial cells. *Am J Physiol Cell Physiol*  
679 2005;289. doi:10.1152/ajpcell.00039.2005.
- 680 [17] Croft AP, Campos J, Jansen K, Turner JD, Marshall J, Attar M, Savary L, Wehmeyer C, Naylor  
681 AJ, Kemble S, Begum J, Dürholz K, Perlman H, Barone F, McGettrick HM, Fearon DT, Wei K,  
682 Raychaudhuri S, Korsunsky I, Brenner MB, Coles M, Sansom SN, Filer A, Buckley CD. Distinct  
683 fibroblast subsets drive inflammation and damage in arthritis. *Nature* 2019;570:246–251.
- 684 [18] Czeschik JC, Hagenacker T, Schäfers M, Büsselberg D. TNF- $\alpha$  differentially modulates ion  
685 channels of nociceptive neurons. *Neuroscience Letters* 2008;434:293–298.
- 686 [19] Dawes JM, Kiesewetter H, Perkins JR, Bennett DLH, McMahon SB. Chemokine expression in  
687 peripheral tissues from the monosodium iodoacetate model of chronic joint pain. *Mol Pain*  
688 2013;9:57–57.
- 689 [20] Dittert I, Benedikt J, Vyklický L, Zimmermann K, Reeh PW, Vlachová V. Improved superfusion  
690 technique for rapid cooling or heating of cultured cells under patch-clamp conditions. *Journal of*  
691 *Neuroscience Methods* 2006;151:178–185.
- 692 [21] Donatien P, Anand U, Yiangou Y, Sinisi M, Fox M, MacQuillan A, Quick T, Korchev YE, Anand  
693 P. Granulocyte-macrophage colony-stimulating factor receptor expression in clinical pain disorder  
694 tissues and role in neuronal sensitization. *Pain Rep* 2018;3:e676–e676.
- 695 [22] Elizur A, Adair-Kirk TL, Kelley DG, Griffin GL, Demello DE, Senior RM. Tumor necrosis factor-  
696 alpha from macrophages enhances LPS-induced clara cell expression of keratinocyte-derived  
697 chemokine. *Am J Respir Cell Mol Biol* 2008;38:8–15.
- 698 [23] Fang D, Kong L-Y, Cai J, Li S, Liu X-D, Han J-S, Xing G-G. Interleukin-6-mediated functional  
699 upregulation of TRPV1 receptors in dorsal root ganglion neurons through the activation of  
700 JAK/PI3K signaling pathway: roles in the development of bone cancer pain in a rat model. *Pain*  
701 2015;156:1124–1144.
- 702 [24] Farr M, Garvey K, Bold AM, Kendall MJ, Bacon PA. Significance of the hydrogen ion  
703 concentration in synovial fluid in rheumatoid arthritis. *Clin Exp Rheumatol* 1985;3:99–104.
- 704 [25] Futami I, Ishijima M, Kaneko H, Tsuji K, Ichikawa-Tomikawa N, Sadatsuki R, Muneta T,  
705 Arikawa-Hirasawa E, Sekiya I, Kaneko K. Isolation and Characterization of Multipotential  
706 Mesenchymal Cells from the Mouse Synovium. *PLoS ONE* 2012;7:e45517.

- 707 [26] Gong W, Kolker SJ, Usachev Y, Walder RY, Boyle DL, Firestein GS, Sluka KA. Acid-sensing ion  
708 channel 3 decreases phosphorylation of extracellular signal-regulated kinases and induces  
709 synoviocyte cell death by increasing intracellular calcium. *Arthritis Research & Therapy*  
710 2014;16:R121.
- 711 [27] Guo W, Yu D, Wang X, Luo C, Chen Y, Lei W, Wang C, Ge Y, Xue W, Tian Q, Gao X, Yao W.  
712 Anti-inflammatory effects of interleukin-23 receptor cytokine-binding homology region rebalance  
713 T cell distribution in rodent collagen-induced arthritis. *Oncotarget* 2016;7:31800–31813.
- 714 [28] Hannan MT. Epidemiologic perspectives on women and arthritis: An overview. *Arthritis &*  
715 *Rheumatism* 1996;9:424–434.
- 716 [29] Hardy RS, Hülso C, Liu Y, Gasparini SJ, Fong-Yee C, Tu J, Stoner S, Stewart PM, Raza K,  
717 Cooper MS, Seibel MJ, Zhou H. Characterisation of fibroblast-like synoviocytes from a murine  
718 model of joint inflammation. *Arthritis Research & Therapy* 2013;15:R24–R24.
- 719 [30] Hong R, Sur B, Yeom M, Lee B, Kim KS, Rodriguez JP, Lee S, Kang KS, Huh C-K, Lee SC,  
720 Hahm D-H. Anti-inflammatory and anti-arthritic effects of the ethanolic extract of *Aralia*  
721 *continentalis* Kitag. in IL-1 $\beta$ -stimulated human fibroblast-like synoviocytes and rodent models of  
722 polyarthritis and nociception. *Phytomedicine* 2018;38:45–56.
- 723 [31] Jones DS, Jenney AP, Swantek JL, Burke JM, Lauffenburger DA, Sorger PK. Profiling drugs for  
724 rheumatoid arthritis that inhibit synovial fibroblast activation. *Nature Chemical Biology*  
725 2016;13:38.
- 726 [32] Jung H, Toth PT, White FA, Miller RJ. Monocyte chemoattractant protein-1 functions as a  
727 neuromodulator in dorsal root ganglia neurons. *J Neurochem* 2008;104:254–263.
- 728 [33] Kawashima M, Ogura N, Akutsu M, Ito K, Kondoh T. The anti-inflammatory effect of  
729 cyclooxygenase inhibitors in fibroblast-like synoviocytes from the human temporomandibular  
730 joint results from the suppression of PGE2 production. *Journal of oral pathology & medicine* :  
731 official publication of the International Association of Oral Pathologists and the American  
732 Academy of Oral Pathology 2013;42:499–506.
- 733 [34] Kolker SJ, Walder RY, Usachev Y, Hillman J, Boyle DL, Firestein GS, Sluka KA. Acid-sensing  
734 ion channel 3 expressed in type B synoviocytes and chondrocytes modulates hyaluronan  
735 expression and release. *ANNALS OF THE RHEUMATIC DISEASES* 2010;69:903–909.
- 736 [35] Larsson S, Englund M, Struglics A, Lohmander LS. Interleukin-6 and tumor necrosis factor alpha  
737 in synovial fluid are associated with progression of radiographic knee osteoarthritis in subjects  
738 with previous meniscectomy. *Osteoarthritis and Cartilage* 2015;23:1906–1914.
- 739 [36] Lebre MC, Vieira PL, Tang MW, Aarrass S, Helder B, Newsom-Davis T, Tak PP, Sreaton GR.  
740 Synovial IL-21/TNF-producing CD4<sup>+</sup> T cells induce joint destruction in rheumatoid arthritis by  
741 inducing matrix metalloproteinase production by fibroblast-like synoviocytes. *Journal of*  
742 *Leukocyte Biology* 2017;101:775–783.
- 743 [37] Livak KJ, Schmittgen TD. Analysis of Relative Gene Expression Data Using Real-Time  
744 Quantitative PCR and the 2 $^{-\Delta\Delta CT}$  Method. *Methods* 2001;25:402–408.



- 745 [38] Llop-Guevara A, Porras M, Cendón C, Di Ceglie I, Siracusa F, Madarena F, Rinotas V, Gómez L,  
746 van Lent PL, Douni E, Chang HD, Kamradt T, Román J. Simultaneous inhibition of JAK and SYK  
747 kinases ameliorates chronic and destructive arthritis in mice. *Arthritis Research & Therapy*  
748 2015;17:356.
- 749 [39] McCall MN, McMurray HR, Land H, Almudevar A. On non-detects in qPCR data. *Bioinformatics*  
750 2014;30:2310–2316.
- 751 [40] Merabova N, Kaminski R, Krynska B, Amini S, Khalili K, Darbinyan A. JCV agnoprotein-  
752 induced reduction in CXCL5/LIX secretion by oligodendrocytes is associated with activation of  
753 apoptotic signaling in neurons. *J Cell Physiol* 2012;227:3119–3127.
- 754 [41] Miller RJ, Jung H, Bhangoo SK, White FA. Cytokine and chemokine regulation of sensory neuron  
755 function. *Handb Exp Pharmacol* 2009;417–449.
- 756 [42] Neumann E, Lefèvre S, Zimmermann B, Gay S, Müller-Ladner U. Rheumatoid arthritis  
757 progression mediated by activated synovial fibroblasts. *Trends in Molecular Medicine*  
758 2010;16:458–468.
- 759 [43] Noss EH, Brenner MB. The role and therapeutic implications of fibroblast-like synoviocytes in  
760 inflammation and cartilage erosion in rheumatoid arthritis. *Immunological Reviews*  
761 2008;223:252–270.
- 762 [44] Oh SB, Tran PB, Gillard SE, Hurley RW, Hammond DL, Miller RJ. Chemokines and  
763 Glycoprotein120 Produce Pain Hypersensitivity by Directly Exciting Primary Nociceptive  
764 Neurons. *J Neurosci* 2001;21:5027.
- 765 [45] Parsonage G, Falciani F, Burman A, Filer A, Ross E, Bofill M, Martin S, Salmon M, Buckley CD.  
766 Global gene expression profiles in fibroblasts from synovial, skin and lymphoid tissue reveals  
767 distinct cytokine and chemokine expression patterns. *Thromb Haemost* 2017;90:688–697.
- 768 [46] Pattison LA, Callejo G, St John Smith E. Evolution of acid nociception: ion channels and receptors  
769 for detecting acid. *Philosophical Transactions of the Royal Society B: Biological Sciences*  
770 2019;374:20190291.
- 771 [47] Picelli S, Faridani OR, Björklund ÅK, Winberg G, Sagasser S, Sandberg R. Full-length RNA-seq  
772 from single cells using Smart-seq2. *Nature Protocols* 2014;9:171–181.
- 773 [48] Rojewska E, Zychowska M, Piotrowska A, Kreiner G, Nalepa I, Mika J. Involvement of  
774 Macrophage Inflammatory Protein-1 Family Members in the Development of Diabetic Neuropathy  
775 and Their Contribution to Effectiveness of Morphine. *Front Immunol* 2018;9:494–494.
- 776 [49] Rosengren S, Boyle DL, Firestein GS. Acquisition, culture, and phenotyping of synovial  
777 fibroblasts. *Methods in molecular medicine* 2007;135:365–375.
- 778 [50] Sarria I, Ling J, Zhu MX, Gu JG. TRPM8 acute desensitization is mediated by calmodulin and  
779 requires PIP(2): distinction from tachyphylaxis. *J Neurophysiol* 2011;106:3056–3066.
- 780 [51] Saxne T, Palladino Jr MA, Heinegård D, Talal N, Wollheim FA. Detection of tumor necrosis  
781 factor  $\alpha$  but not tumor necrosis factor  $\beta$  in rheumatoid arthritis synovial fluid and serum. *Arthritis*  
782 & *Rheumatism* 1988;31:1041–1045.

- 783 [52] Schaible H-G. Nociceptive neurons detect cytokines in arthritis. *ARTHRITIS RESEARCH &*  
784 *THERAPY* 2014;16.
- 785 [53] Scott BB, Weisbrot LM, Greenwood JD, Bogoch ER, Paige CJ, Keystone EC. Rheumatoid  
786 arthritis synovial fibroblast and U937 macrophage/monocyte cell line interaction in cartilage  
787 degradation. *Arthritis & Rheumatism* 1997;40:490–498.
- 788 [54] Sluka KA, Rasmussen LA, Edgar MM, O'Donnell JM, Walder RY, Kolker SJ, Boyle DL,  
789 Firestein GS. Acid-sensing ion channel 3 deficiency increases inflammation but decreases pain  
790 behavior in murine arthritis. 2013.
- 791 [55] Stefanini M, Martino C de, Zamboni L. Fixation of Ejaculated Spermatozoa for Electron  
792 Microscopy. *Nature* 1967;216:173–174.
- 793 [56] Syx D, Tran PB, Miller RE, Malfait A-M. Peripheral Mechanisms Contributing to Osteoarthritis  
794 Pain. *Current Rheumatology Reports* 2018;20:9.
- 795 [57] Taylor PC, Feldmann M. Anti-TNF biologic agents: still the therapy of choice for rheumatoid  
796 arthritis. *Nature Reviews Rheumatology* 2009;5:578.
- 797 [58] Tetta C, Camussi G, Modena V, Di Vittorio C, Baglioni C. Tumour necrosis factor in serum and  
798 synovial fluid of patients with active and severe rheumatoid arthritis. *Ann Rheum Dis*  
799 1990;49:665–667.
- 800 [59] Wang YY, Chang RB, Waters HN, McKemy DD, Liman ER. The nociceptor ion channel TRPA1  
801 is potentiated and inactivated by permeating calcium ions. *J Biol Chem* 2008;283:32691–32703.
- 802 [60] Woolf CJ, Allchorne A, Safieh-Garabedian B, Poole S. Cytokines, nerve growth factor and  
803 inflammatory hyperalgesia: the contribution of tumour necrosis factor  $\alpha$ . *British Journal of*  
804 *Pharmacology* 1997;121:417–424.
- 805 [61] Wright AJ, Husson ZMA, Hu D-E, Callejo G, Brindle KM, Smith ESTJ. Increased hyperpolarized  
806 [1-<sup>13</sup>C] lactate production in a model of joint inflammation is not accompanied by tissue acidosis  
807 as assessed using hyperpolarized <sup>13</sup>C-labelled bicarbonate. *NMR in Biomedicine* 2018:e3892-n/a.
- 808 [62] Yamamura Y, Gupta R, Morita Y, He X, Pai R, Endres J, Freiberg A, Chung K, Fox DA. Effector  
809 Function of Resting T Cells: Activation of Synovial Fibroblasts. *J Immunol* 2001;166:2270.
- 810 [63] Zhang F, Wei K, Slowikowski K, Fonseka CY, Rao DA, Kelly S, Goodman SM, Tabechian D,  
811 Hughes LB, Salomon-Escoto K, Watts GFM, Jonsson AH, Rangel-Moreno J, Meednu N, Rozo C,  
812 Apruzzese W, Eisenhaure TM, Lieb DJ, Boyle DL, Mandelin AM 2nd, Accelerating Medicines  
813 Partnership Rheumatoid Arthritis and Systemic Lupus Erythematosus (AMP RA/SLE)  
814 Consortium, Boyce BF, DiCarlo E, Gravalles EM, Gregersen PK, Moreland L, Firestein GS,  
815 Hachohen N, Nusbaum C, Lederer JA, Perlman H, Pitzalis C, Filer A, Holers VM, Bykerk VP,  
816 Donlin LT, Anolik JH, Brenner MB, Raychaudhuri S. Defining inflammatory cell states in  
817 rheumatoid arthritis joint synovial tissues by integrating single-cell transcriptomics and mass  
818 cytometry. *Nat Immunol* 2019;20:928–942.

819

820 Figure Legends:

821 Figure 1: Induction of inflammation in FLS derived from mouse knee.

822 A) Representative picture showing exposed inside of the patella (black triangle) and the  
823 surrounding ligament and fat pad (white triangle) after midline resection and distal pull of the  
824 quadriceps muscles. Scale bar = 2 mm. B) Representative picture of FLS in culture. Scale bar =  
825 50  $\mu$ m. C) Bars represent fold change of the genes *Il-6*, *Il-1 $\alpha$* , *Cox-2* and *Cox-1* from either Contra  
826 (vs. Ipsi) or control (vs. TNF). Black hatched bars = control FLS, red bars = TNF-FLS, grey bar =  
827 Contra, white bar = Ipsi. All FLS at P5. D) Images of mouse inflammatory array membranes  
828 probed against FLS conditioned medium (i) which were quantified by densitometry and  
829 represented as bar graphs showing fold change of various cytokines between control and TNF-  
830 FLS (ii, multiple t-test with Holm-Sidak correction) and among Contra, Ipsi and TNF from control  
831 FLS media (iii, ANOVA with Tukey's post-hoc test) and spot intensity differences. Dotted  
832 rectangles highlight IL-6 spots (Di) and corresponding quantifications (Dii, iii). Only cytokines  
833 that were present in all of the compared groups are shown in graphs. \*  $p < 0.05$ , \*\*  $p < 0.01$ , \*\*\*  
834  $p < 0.001$  and \*\*\*\*  $p < 0.0001$ . Error bars = SEM.

835

836 Figure 2. Pro-inflammatory gene expression in FLS derived from arthritic human patients.

837 A) Transcripts per million values of selected inflammatory markers extracted from RNA-Seq data  
838 of human FLS from RA and OA donors [63]. Results reveal detectable levels of the pro-  
839 inflammatory genes *IL-6*, *IL-8*, *IL-1 $\alpha$* , *KC*, *MCP-1*, *SDF-1* and *Fractalkine* in FLS from both OA  
840 (black) and RA (blue) patients. *LIX* was considered undetectable as the mean transcript per million  
841 value was below the threshold of 1. B) Bar graphs showing fold change in expression levels

842 (determined by qPCR) of *IL-6*, *KC*, *LIX*, *MCP-1*, *IL-8*, *IL-1R1*, *SDF-1* and *Fractalkine* in control  
843 vs. TNF- $\alpha$  stimulated FLS derived from human RA and OA patients (n = 4). \* p < 0.05, \*\* p < 0.01,  
844 unpaired t-test.

845

846 Figure 3: Acid sensitivity in FLS.

847 A) Representative Ca<sup>2+</sup> imaging trace from an FLS responding to pH 5 and ionomycin. Bi) Bars  
848 representing proportions and magnitudes (ii) of control (black hatched) and TNF-FLS (red)  
849 responding to pH 7, 6, 5 and 4. Comparison between control vs. TNF-FLS made using chi-sq test.  
850 Data from three biological replicates in each category. Ci) Gel image of control and TNF-FLS  
851 expression of proton sensors along with the densitometry analysis of the relative band intensity  
852 compared to the 18S band (ii, multiple t-test with Holm-Sidak correction). \*\* p < 0.01, \*\*\* p <  
853 0.001 and \*\*\*\* p < 0.0001. Error bars = SEM.

854

855 Figure 4: TNF-FLS mediated increase in excitability of knee neurons.

856 A) Representative live-cell imaging picture showing FLS (magenta) and neuron (cyan) in co-  
857 culture. Scale bar = 50  $\mu$ m. B) Representative FB labelled knee neuron (white arrow) being  
858 recorded using a patch pipette (triangular shadow), surrounded by FLS (yellow arrow). Scale bar  
859 = 50  $\mu$ m. C) Pie-chart showing proportion of knee neurons that fired AP without current  
860 stimulation in healthy (neuron mono-culture + neuron/control FLS, n = 37, black) and inflamed  
861 (neuron/TNF-FLS + neuron/TNF-FLS media, n = 41, red) condition. D) Representative knee  
862 neuron incubated with TNF-FLS media firing spontaneous AP along with schematic diagram of  
863 AP properties measured (inset). E) Bar graphs showing measured RMP (i), threshold (ii), AHP

864 peak (iii) and HPD (iv) from knee neurons in mono-culture (n = 19, white bar/black open circle),  
865 in co-culture with control FLS (n = 18, grey bar/black dotted circle), in co-culture with TNF-FLS  
866 (n = 20, light red bar/red dotted circle) and incubated in TNF-FLS media (n = 21, white bar/red  
867 open circle). \* p < 0.05 and \*\*\* p < 0.001, ANOVA followed by Tukey's post hoc test. Data from  
868 4-5 female mice in each group. Error bars = SEM.

869

870 Figure 5: TNF-FLS mediated modulation of TRP agonist response in knee neurons.

871 Representative traces showing capsaicin (TRPV1 agonist, Ai), cinnamaldehyde (TRPA1 agonist,  
872 Bi) and menthol- (TRPM8 agonist, Ci) evoked responses in knee neurons. Black traces obtained  
873 from knee neuron in mono-culture, red trace obtained from knee neuron incubated in TNF-FLS  
874 media. White boxes represent perfusion of extracellular solution. Bar graphs showing peak current  
875 densities of capsaicin- (Aii), cinnamaldehyde- (Bii) or menthol-evoked (Cii) currents from knee  
876 neurons in mono-culture (white bar/black open circle), in co-culture with control FLS (grey  
877 bar/black dotted circle), in co-culture with TNF-FLS (light red bar/red dotted circle) and incubated  
878 in TNF-FLS media (white bar/red open circle) Comparison between groups made using ANOVA  
879 with Tukey's post hoc test. Bar graphs showing percent of knee neurons that responded to  
880 capsaicin (Aiii), cinnamaldehyde (Biii) and menthol (Ciii) in healthy (neuron mono-culture +  
881 neuron/control FLS) and inflamed (neuron/TNF-FLS + neuron/TNF-FLS media) condition.  
882 Comparison made using chi-sq test. \* p < 0.05. Data from 4-5 female mice in each group. Error  
883 bars = SEM.

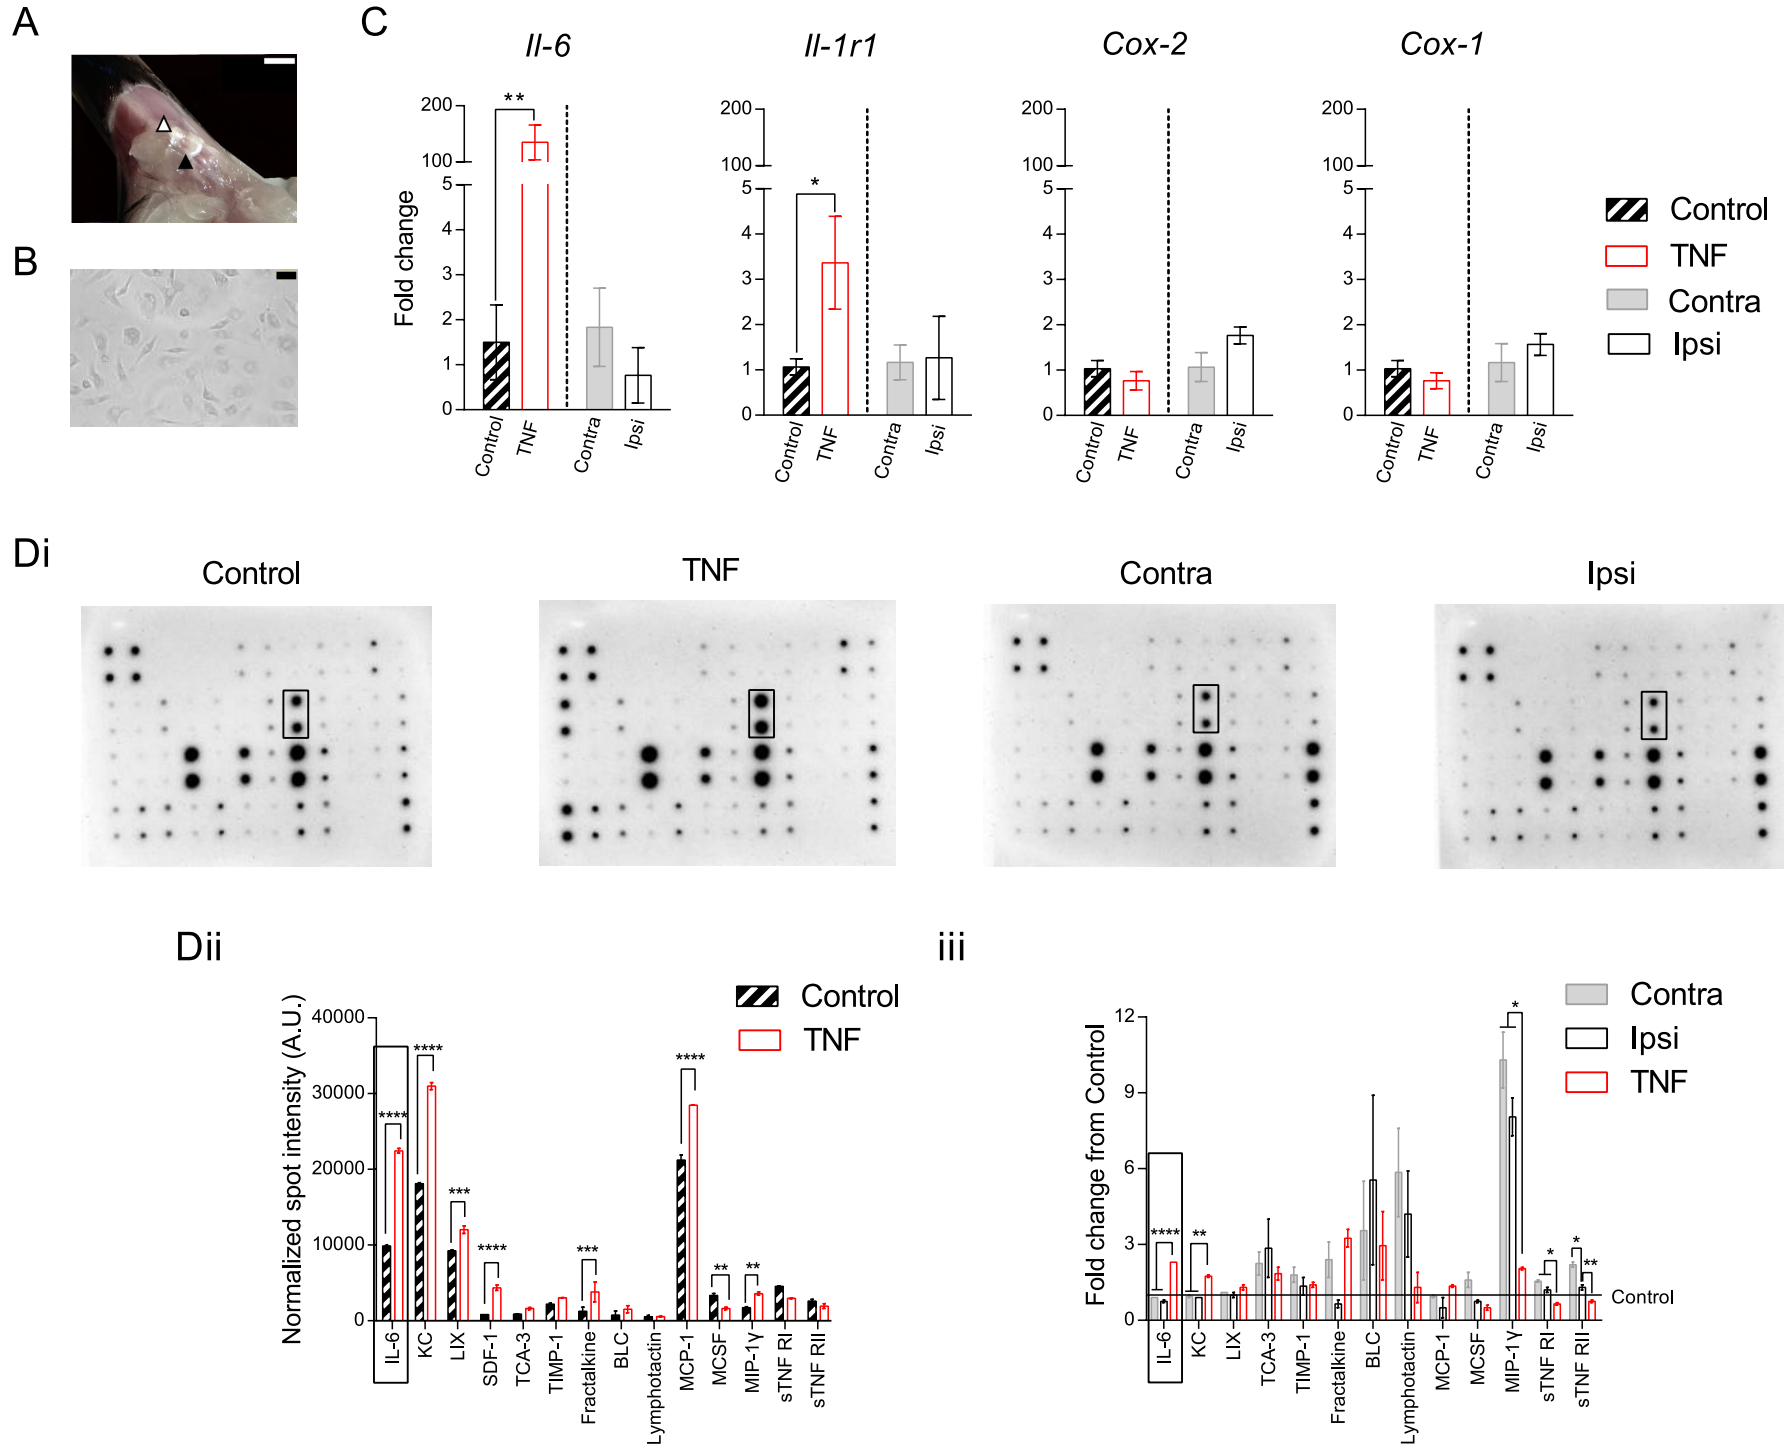

bioRxiv preprint doi: <https://doi.org/10.1101/791251>; this version posted January 17, 2020. The copyright holder for this preprint (which was not certified by peer review) is the author/funder, who has granted bioRxiv a license to display the preprint in perpetuity. It is made available under aCC-BY-NC-ND 4.0 International license.

A

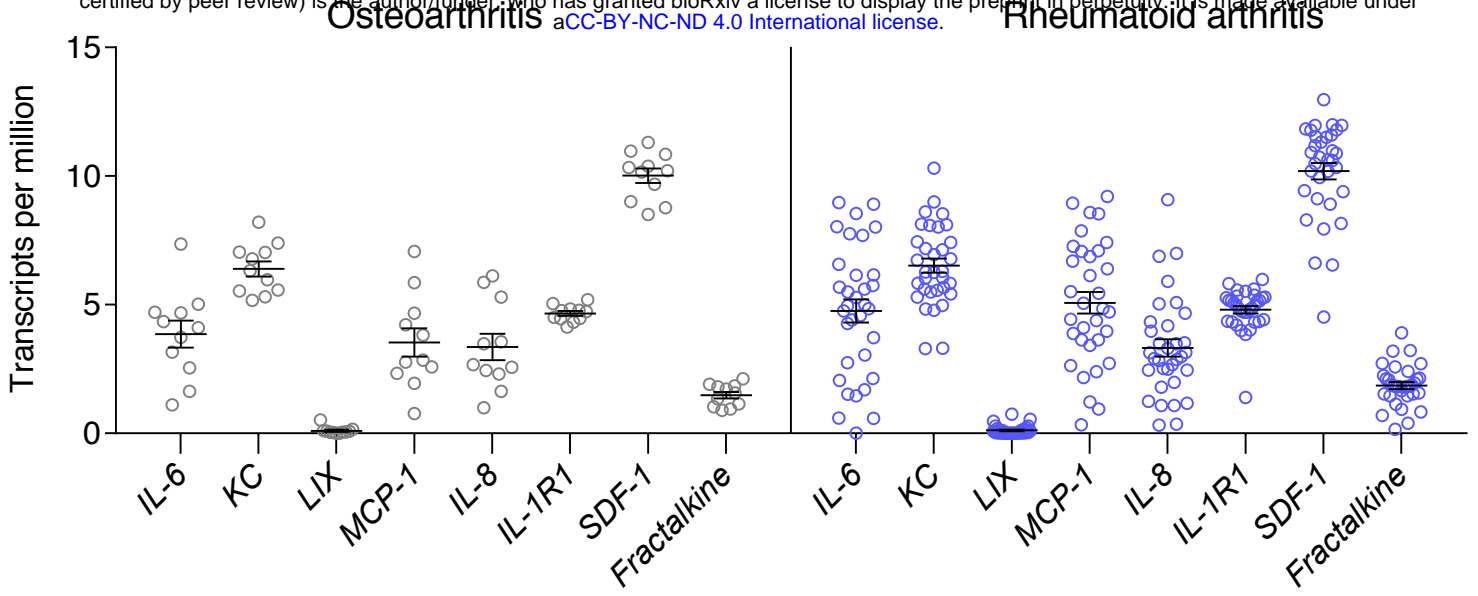

B

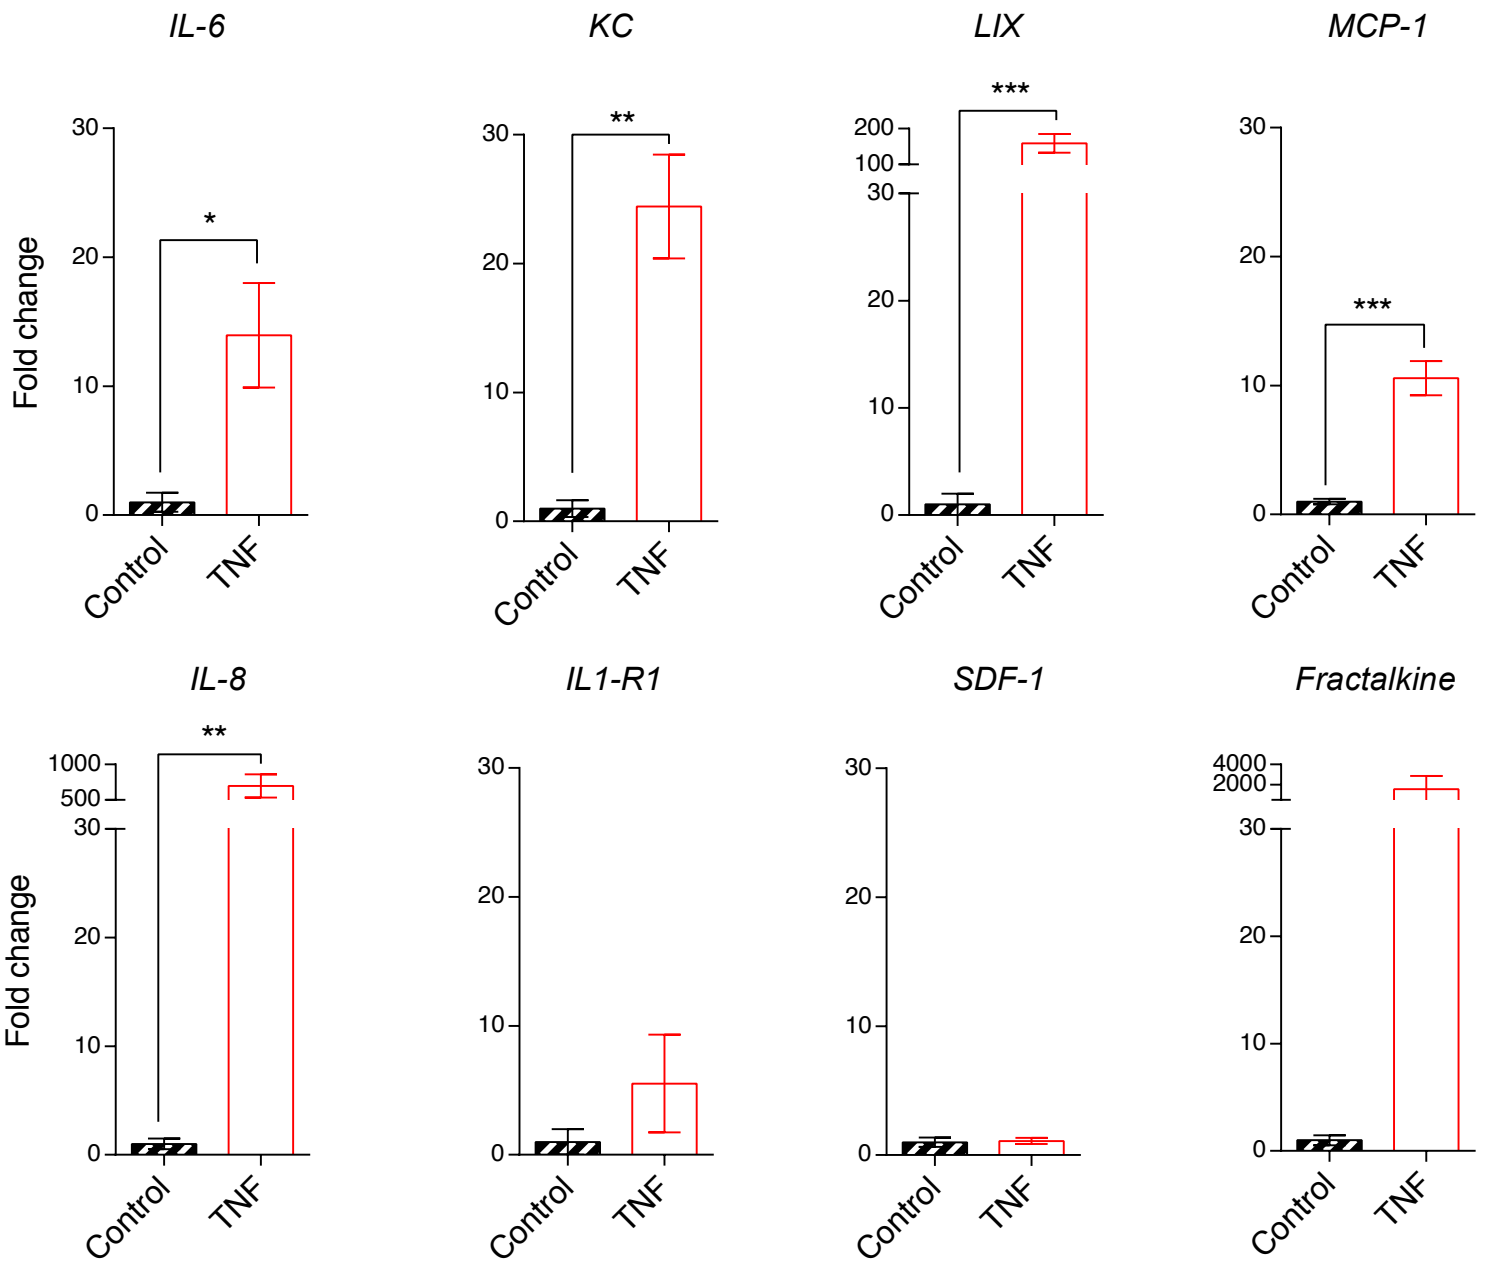

**Figure 3**

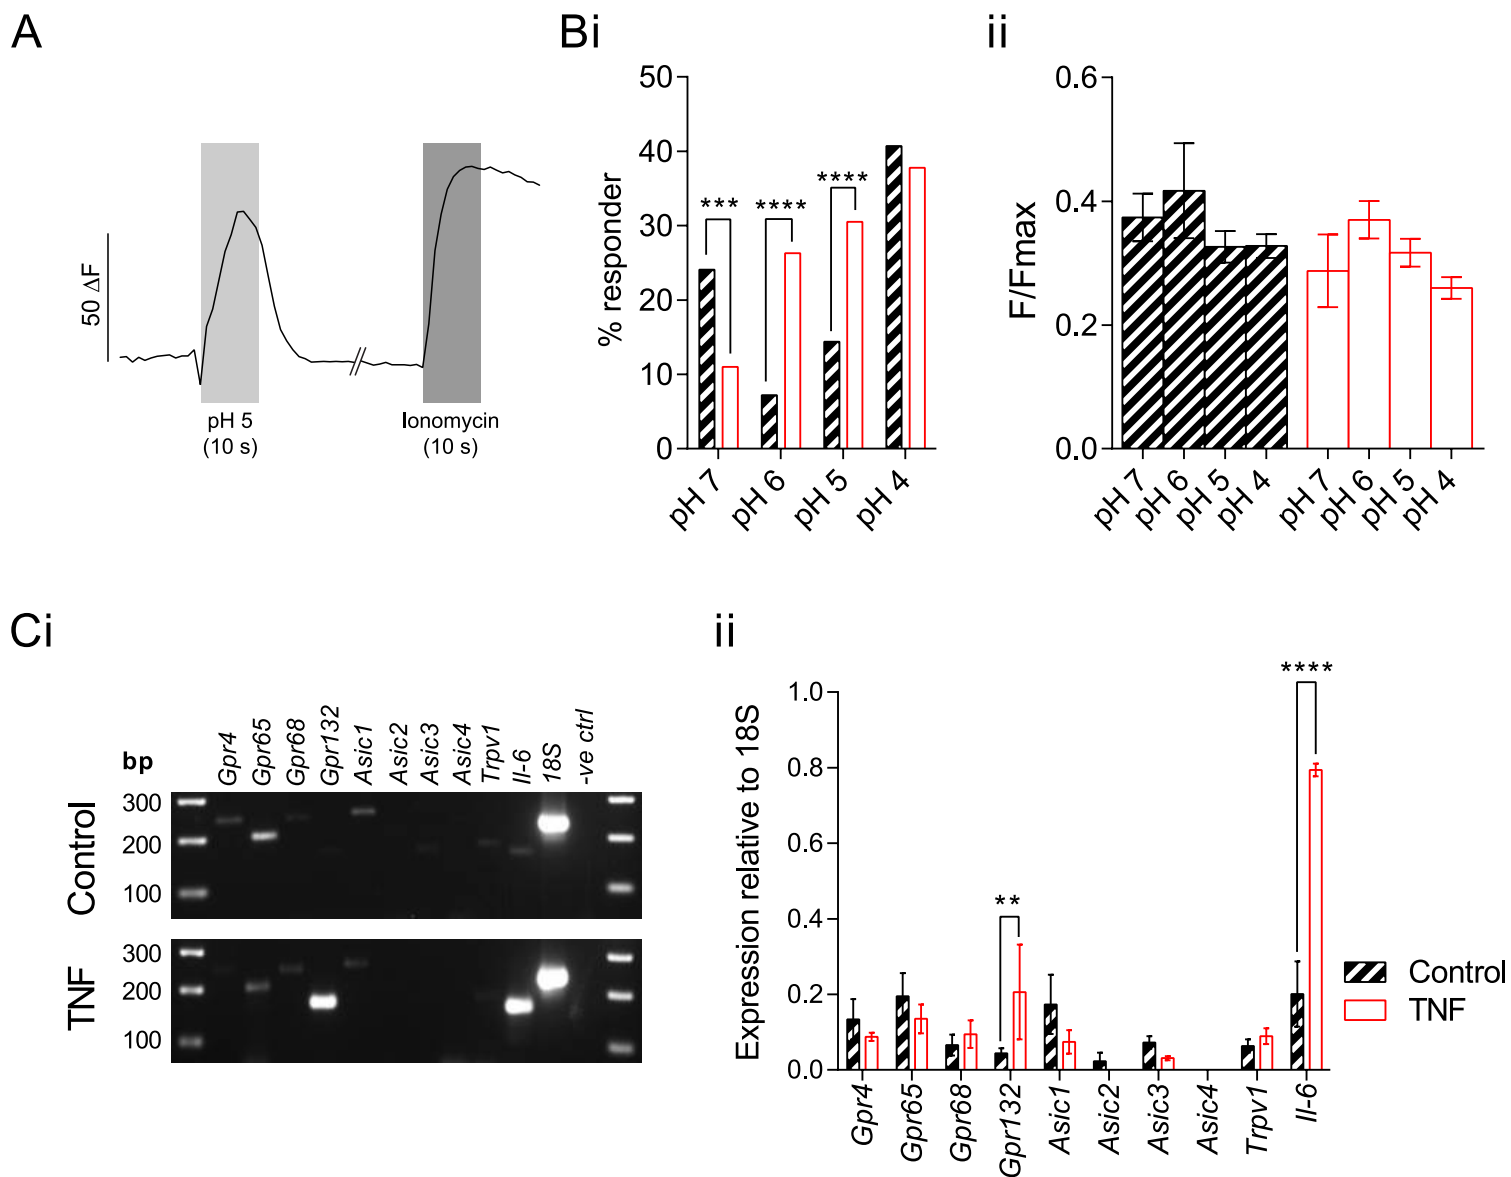



bioRxiv preprint doi: <https://doi.org/10.1101/791251>; this version posted January 17, 2020. The copyright holder for this preprint (which was not certified by peer review) is the author/funder, who has granted bioRxiv a license to display the preprint in perpetuity. It is made available under aCC-BY-NC-ND 4.0 International license.

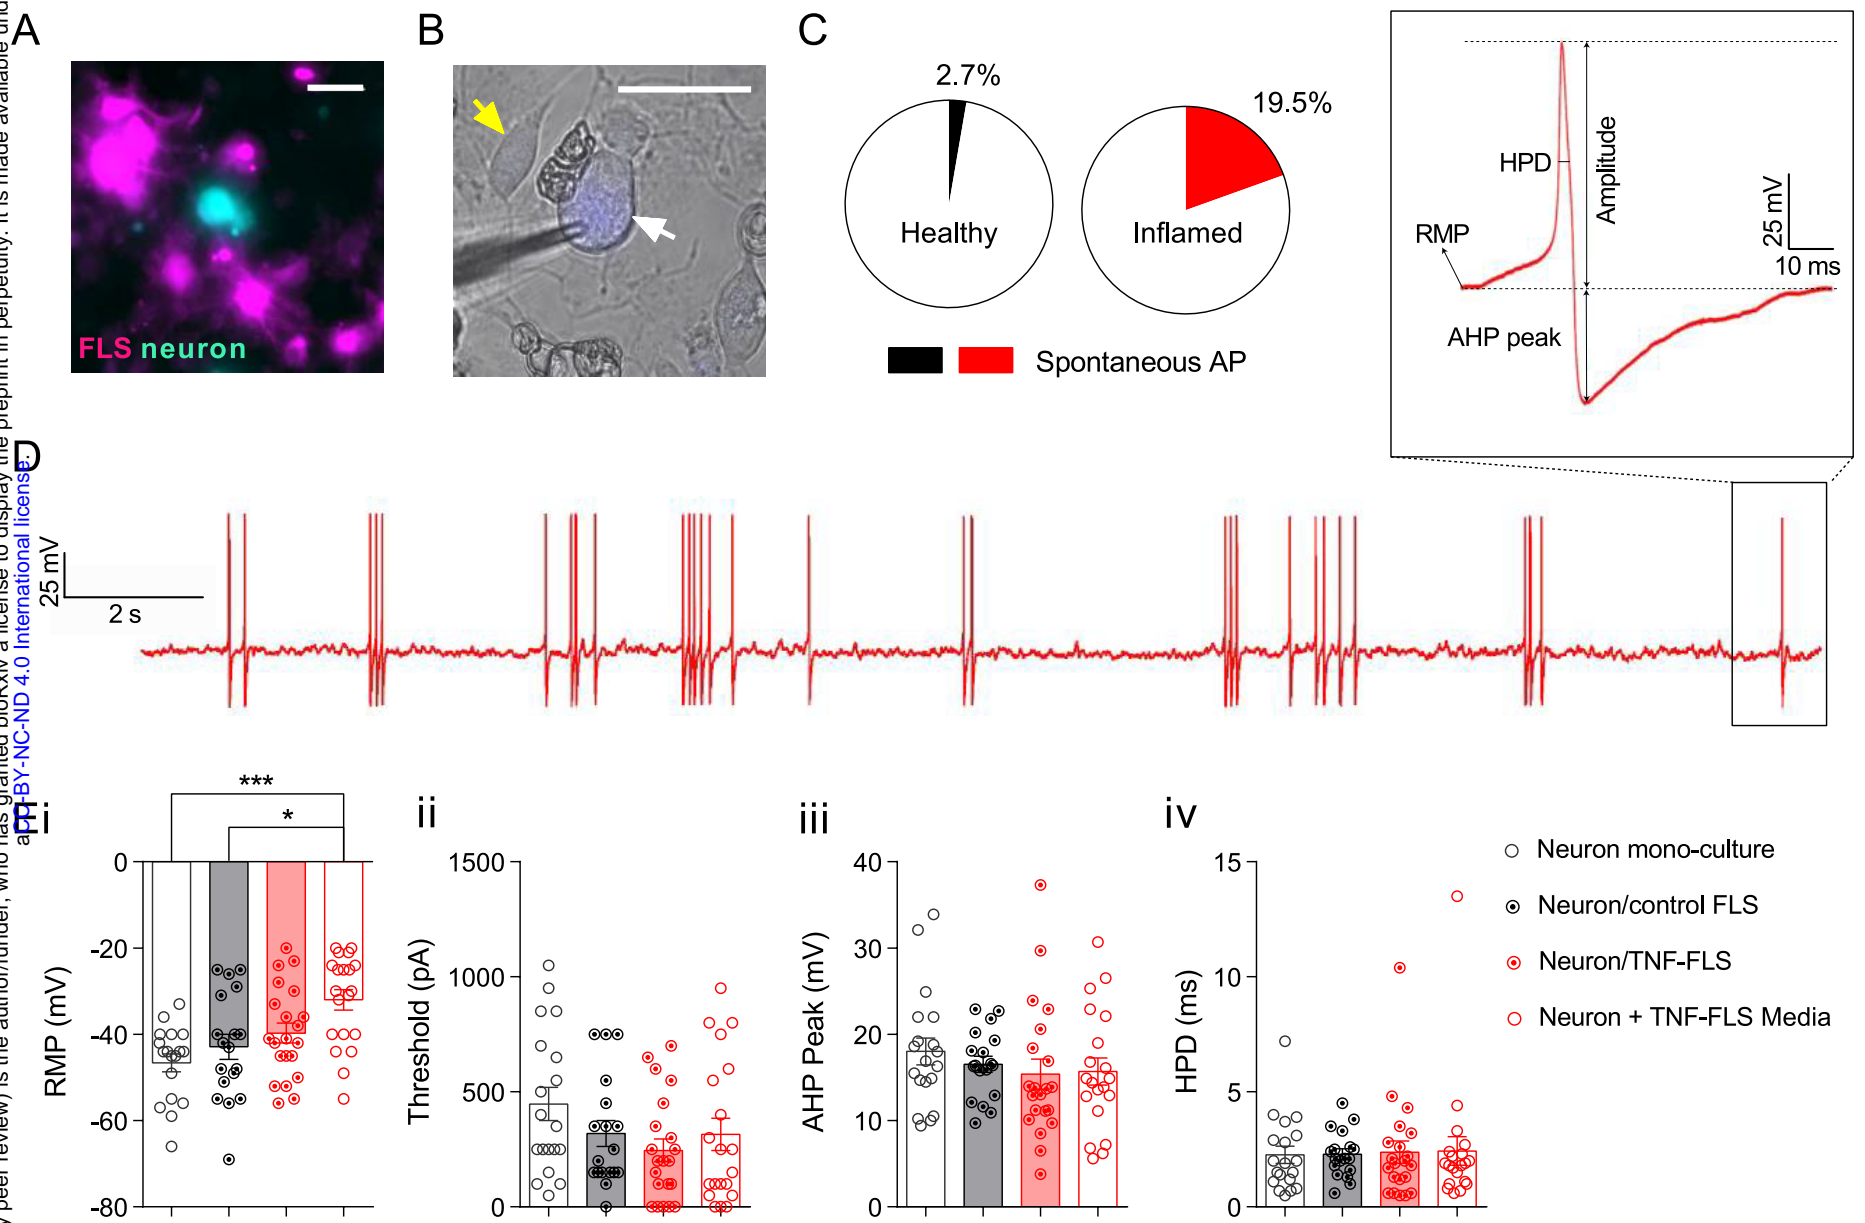

bioRxiv preprint doi: <https://doi.org/10.1101/791251>; this version posted January 17, 2020. The copyright holder for this preprint (which was not certified by peer review) is the author/funder, who has granted bioRxiv a license to display the preprint in perpetuity. It is made available under aCC-BY-NC-ND 4.0 International license.

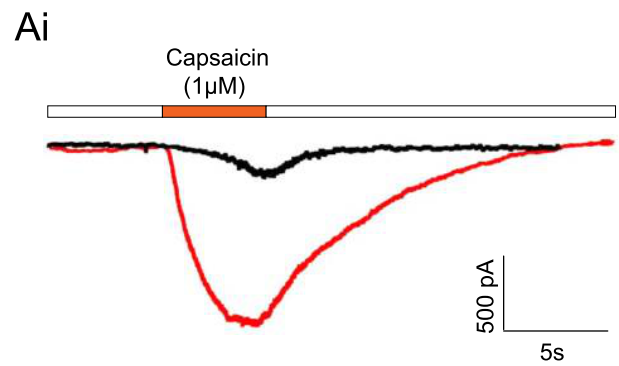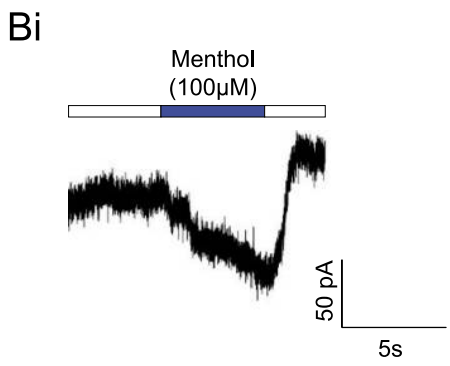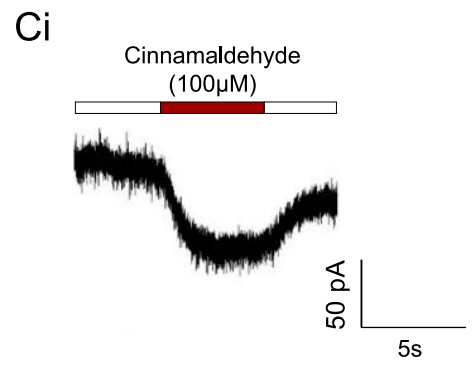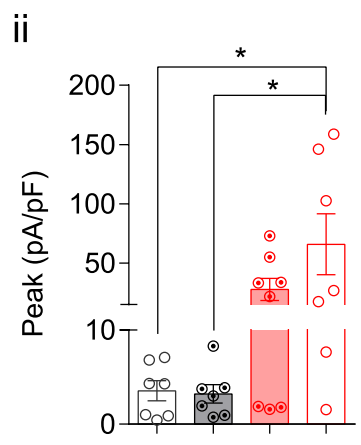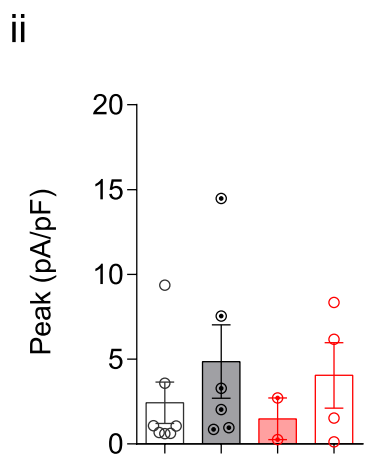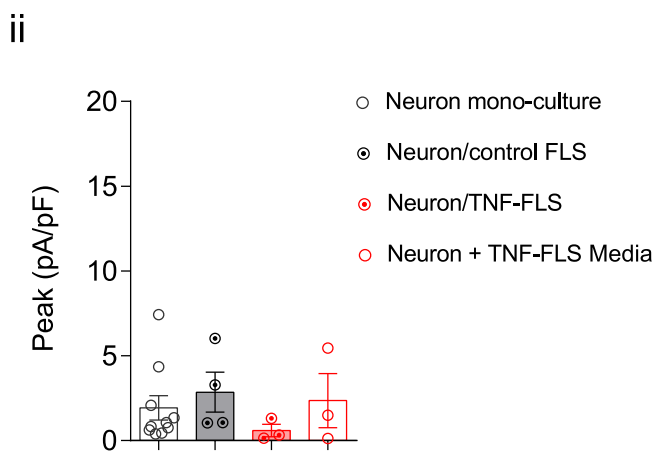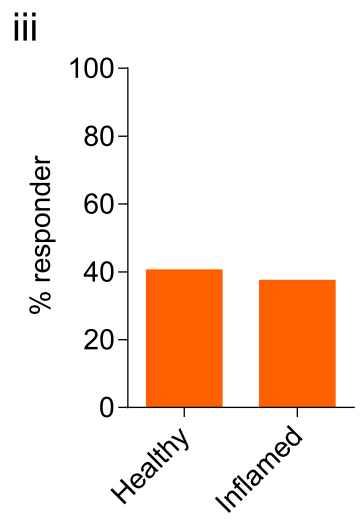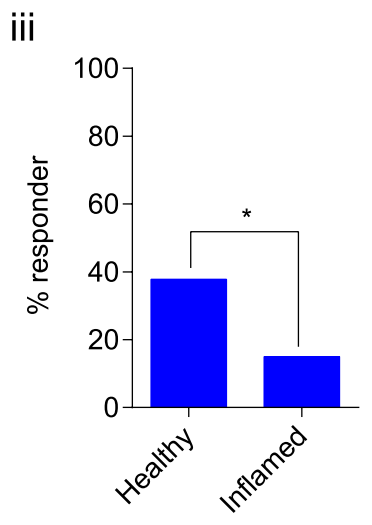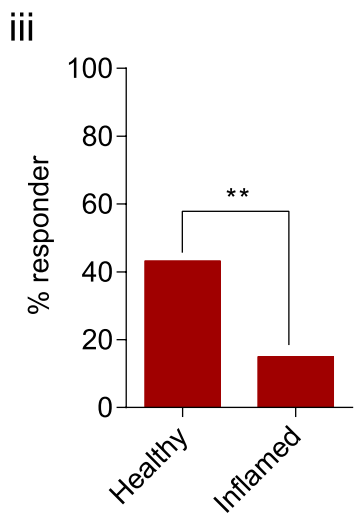

Supplementary Table 1: Genes of interest analyzed in this study.

| Gene                    | TaqMan Assay ID/sequence                                                         | Role                               |
|-------------------------|----------------------------------------------------------------------------------|------------------------------------|
| <b>Taqman Probes</b>    |                                                                                  |                                    |
| <i>18S</i>              | Mm03928990_g1                                                                    | Housekeeping                       |
| <i>Cd68</i>             | Mm03047343_m1                                                                    | Macrophage marker                  |
| <i>Cdh11</i>            | Mm00515466_m1                                                                    | Intimal synovial fibroblast marker |
| <i>Cd-248</i>           | Mm00547485_s1                                                                    | Synovial fibroblast marker         |
| <i>Cd-31</i>            | Mm01242576_m1                                                                    | Endothelial marker                 |
| <i>Il-6</i>             | Mm00446190_m1                                                                    | Inflammation                       |
| <i>Il-1r1</i>           | Mm00434237_m1                                                                    | Inflammation                       |
| <i>Cox-1</i>            | Mm04225243_g1                                                                    | Constitutively active gene         |
| <i>Cox-2</i>            | Mm03294838_g1                                                                    | Inflammation                       |
| <b>RT-q/PCR primers</b> |                                                                                  |                                    |
| <i>18S</i>              | Fwd: CCGGTACAGTGAAACTGCGA<br>Rev: ATCTAGAGTCACCAAGCCGC<br>Product size: 230 bp   | Housekeeping                       |
| <i>Human B2M</i>        | Fwd: GAGGCTATCCAGCGTACTCCA<br>Rev: CGGCAGGCATACTCATCTTTT<br>Product size: 248 bp | Housekeeping                       |
| <i>Human Ywhaz</i>      | Fwd: TGTAGGAGCCCGTAGGTCATC<br>Rev: GTGAAGCATTGGGGATCAAGA<br>Product size: 179 bp | Housekeeping                       |
| <i>Gpr4</i>             | Fwd: ATTCAGCACCGCTCTTCCAT<br>Rev: CAGGGCCAGACGTTTGATCT<br>Product size: 236 bp   | Proton-sensing GPCR                |
| <i>Gpr65</i>            | Fwd: CAACATCGGATCTTTATGCG<br>Rev: ATGTAGGTGAAGAAAACGCT<br>Product size: 195 bp   | Proton-sensing GPCR                |

|                   |                                                                                             |                                         |
|-------------------|---------------------------------------------------------------------------------------------|-----------------------------------------|
| <i>Gpr68</i>      | Fwd: TTCTCCCTCCTCCTCACCAG<br>Rev: GGCTGAGTGGAGCTTGGTTA<br>Product size: 234 bp              | Proton-sensing GPCR                     |
| <i>Gpr132</i>     | Fwd: CCACTACCTGCGTTTCACCT<br>Rev: CCAGGAAGATGGTGACGACC<br>Product size: 161 bp              | Proton-sensing GPCR                     |
| <i>Asic1</i>      | Fwd: ACACATTCAACTCGGGCCAA<br>Rev: TGCTCCTGGCAAGACACAAA<br>Product size: 250 bp              | Acid-sensing ion channel                |
| <i>Asic2</i>      | Fwd: TGCTGCCTTACTTGGTGACA<br>Rev: CGGAGTGGTTTGGCATTGTG<br>Product size: 194 bp              | Acid-sensing ion channel                |
| <i>Asic3</i>      | Fwd: AGAAGGAGCTCTCAAAGGCG<br>Rev: AGGTAACAGGTACGGTGGGA<br>Product size: 158 bp              | Acid-sensing ion channel                |
| <i>Asic4</i>      | Fwd: AGCGGCTAACTTATCTGCCC<br>Rev: CAAGGGAGTCCAGTGTGTGG<br>Product size: 234 bp              | Acid-sensing ion channel                |
| <i>Trpv1</i>      | Fwd: GACACCATTGCTCTGCTCCT<br>Rev: GCCTGGACATCTGCTCCATT<br>Product size: 176 bp              | Heat and proton transducing ion channel |
| <i>Il-6</i>       | Fwd: AGCCAGAGTCCTTCAGAGAGA<br>Rev: TGGTCTTGGTCCTTAGCCAC<br>Product size: 226 bp             | Inflammation                            |
| <i>Human IL-6</i> | Fwd:<br>ACTCACCTCTTCAGAACGAATTG<br>Rev:<br>CCATCTTTGGAAGGTTTCAGGTTG<br>Product size: 149 bp | Inflammation                            |
| <i>Human IL-8</i> | Fwd: CAGAGACAGCAGAGCACACA                                                                   | Inflammation                            |

|                          |                                                                                  |              |
|--------------------------|----------------------------------------------------------------------------------|--------------|
|                          | Rev: GGCAAAACTGCACCTTCACA<br>Product size: 158 bp                                |              |
| <i>Human IL-1R1</i>      | Fwd: GGGATCCCATCACCTCCA<br>Rev: GCATTTATCAGCCTCCAGAGAAGA<br>Product size: 186 bp | Inflammation |
| <i>Human KC</i>          | Fwd: ACCGAAGTCATAGCCCACTC<br>Rev: CTCCTTCAGGAACAGCCACC<br>Product size: 155 bp   | Inflammation |
| <i>Human LIX</i>         | Fwd: ACGCAAGGAGTTCATCCCAA<br>Rev: GTTTTCTTGTTTCCACCGTCC<br>Product size: 180 bp  | Inflammation |
| <i>Human SDF-1</i>       | Fwd: CGAAAGCCATGTTGCCAGAG<br>Rev: CCGGGCTACAATCTGAAGGG<br>Product size: 82 bp    | Inflammation |
| <i>Human Fractalkine</i> | Fwd: ATCTGACTGTCCTGCTGGCT<br>Rev: CTCCAAGATGATTGCGCGTTT<br>Product size: 149 bp  | Inflammation |
| <i>Human MCP-1</i>       | Fwd: GAAAGTCTCTGCCGCCCTT<br>Rev: GGGGCATTGATTGCATCTGG<br>Product size: 90 bp     | Inflammation |

Fwd = Forward primer sequence, Rev = reverse primer sequence.

Supplementary Table 2: Location of cytokines detected by the mouse inflammatory antibody array membrane.

|   | A       | B            | C             | D            | E      | F      | G             | H       | I         | J          | K              | L              |
|---|---------|--------------|---------------|--------------|--------|--------|---------------|---------|-----------|------------|----------------|----------------|
| 1 | Pos     | Pos          | Neg           | Neg          | Blank  | BLC    | CD30 L        | Eotaxin | Eotaxin-2 | Fas Ligand | Fractalkine    | GCSF           |
| 2 | Pos     | Pos          | Neg           | Neg          | Blank  | BLC    | CD30 L        | Eotaxin | Eotaxin-2 | Fas Ligand | Fractalkine    | GCSF           |
| 3 | GM-CSF  | IFN $\gamma$ | IL-1 $\alpha$ | IL-1 $\beta$ | IL-2   | IL-7   | IL-4          | IL-6    | IL-9      | IL-10      | IL-12 p40/p70  | IL-12 p70      |
| 4 | GM-CSF  | IFN $\gamma$ | IL-1 $\alpha$ | IL-1 $\beta$ | IL-2   | IL-7   | IL-4          | IL-6    | IL-9      | IL-10      | IL-12 p40/p70  | IL-12 p70      |
| 5 | IL-13   | IL-17        | I-TAC         | KC           | Leptin | LIX    | Lymphot actin | MCP-1   | MCSF      | MIG        | MIP-1 $\alpha$ | MIP-1 $\gamma$ |
| 6 | IL-13   | IL-17        | I-TAC         | KC           | Leptin | LIX    | Lymphot actin | MCP-1   | MCSF      | MIG        | MIP-1 $\alpha$ | MIP-1 $\gamma$ |
| 7 | RANTE S | SDF-1        | TCA-3         | TECK         | TIMP-1 | TIMP-2 | TNF- $\alpha$ | sTNF RI | sTNF R II | Blank      | Blank          | Pos            |
| 8 | RANTE S | SDF-1        | TCA-3         | TECK         | TIMP-1 | TIMP-2 | TNF- $\alpha$ | sTNF RI | sTNF R II | Blank      | Blank          | Pos            |

BLC = B lymphocyte chemoattractant, GCSF = granulocyte colony stimulating factor, GM-CSF = granulocyte-macrophage colony stimulating factor, IFN = interferon, IL= interleukin, I-TAC = interferon inducible T-cell alpha chemoattractant, KC = Keratinocyte chemoattractant (chemokine ligand 1), LIX = lipopolysaccharide induced chemokine, MCP = monocyte chemoattractant protein, MCSF = macrophage colony stimulating factor, MIG = monokine induced by gamma interferon, MIP = macrophage inflammatory protein, RANTES = Regulated on activation, normal T-cell expressed and secreted, SDF= stromal cell derived factor, TCA = T-cell activation gene, TECK = thymus expressed chemokine, TIMP = Tissue inhibitor of metalloproteinase, TNF(R) = tumor necrosis factor (receptor), Pos = Positive spot, Neg = negative spot.

Table 3: Patient information from whom FLS were derived. RA = Rheumatoid Arthritis, OA = Osteoarthritis, F = Female.

|                                |                              |                                    |                                    |         |
|--------------------------------|------------------------------|------------------------------------|------------------------------------|---------|
| <b>Gender</b>                  | F                            | F                                  | F                                  | F       |
| <b>Pathology</b>               | RA                           | RA                                 | RA                                 | OA      |
| <b>Age</b>                     | 74                           | 61                                 | 81                                 | 68      |
| <b>Disease duration</b>        | >7yrs                        | 25yrs                              | >10yrs                             | Unknown |
| <b>Disease Modifying Drugs</b> | Certolizumab<br>Prednisolone | Methotrexate<br>Hydroxychloroquine | Methotrexate<br>Hydroxychloroquine | Unknown |

Supplementary Figure 1

Characterization of FLS

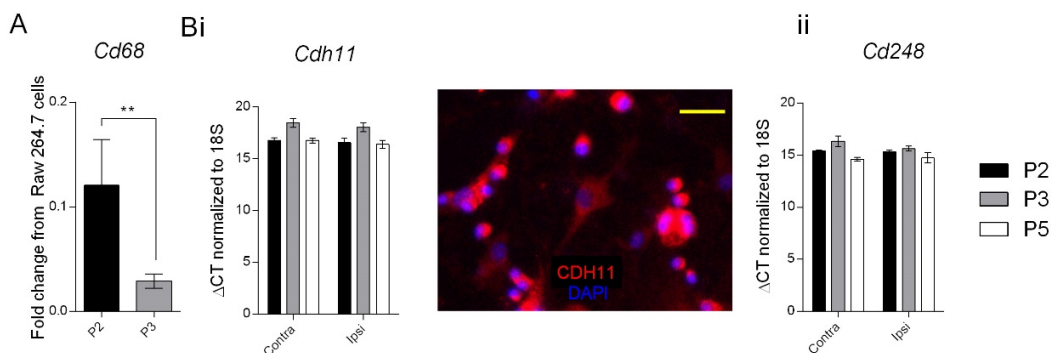

Expression of inflammation-related genes in FLS derived from CFA-injected knee joint

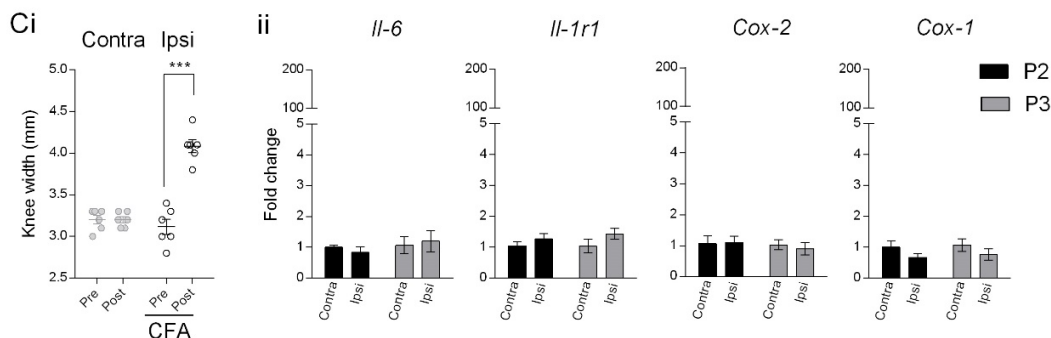

MIP-1 $\gamma$  activation of DRG neurons

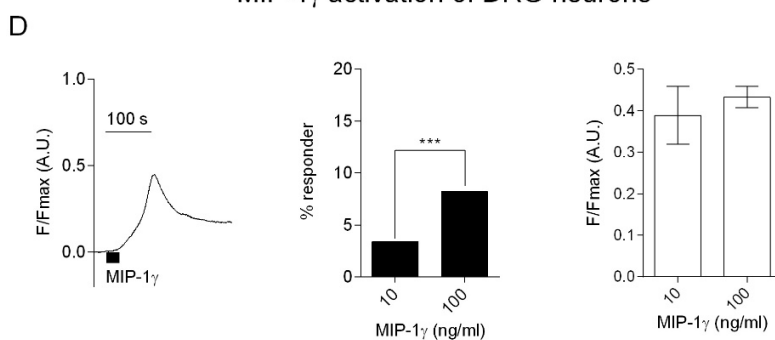

Supplementary Figure 1: Characterization of mouse primary FLS and neuronal activation of FLS secreted MIP-1 $\gamma$ . A) Bars showing reduction in mRNA expression of the macrophage marker *Cd68* from P2 to P3 expressed as fold change from macrophage cell line Raw 264.7 cells. \*\*  $p < 0.01$ , ratio paired t-test. Bi) Expression of FLS marker *Cdh11* across P2-P5 in ipsi and contra FLS normalized to housekeeping gene *18S* (left) and a representative image of CDH-11 (red) and DAPI (blue) stained FLS in culture. ii) Expression of FLS marker *Cd68* across P2-P5 in ipsi and contra



FLS normalized to housekeeping gene *18S*. Ci) Mouse knee width in Contra (grey circles) and Ipsi (open circles) limbs before and after injection of CFA ( $n = 6$ , paired t-test. ii) Bars represent fold change of the genes *Il-6*, *Il-1 $\alpha$* , *Cox-2* and *Cox-1* from Contra vs. Ipsi. Black bars = P2, grey bars = P3. D) Intracellular  $Ca^{2+}$  influx in lumbar DRG neurons in response to 20 s application of 100 ng/ml MIP-1 $\gamma$ , followed by percentage of neurons responding to 10 and 100 ng/ml of MIP-1 $\gamma$  and their respective peak response. > 500 neurons imaged from three male mice. \*\*\*  $p < 0.001$ , chi-sq test. Error bars represent SEM.
